# Supplementary material for: The cooperative IGS RT-GIMs: a global and accurate estimation of the ionospheric electron content distribution in real-time
Source: Copernicus journal article supplement (doi:10.5194/essd-2021-136), 2021-05-04
Supplement: Supplementary file [file essd-2021-136-AC1-supplement.zip]

Manuscript Title: The cooperative IGS RT-GIMs: a global and accurate estimation of the ionospheric electron content distribution in real-time

Manuscript Number: essd-2021-136

Corresponding Author: Manuel Hernández-Pajares

Dear anonymous referee,

We thank the anonymous reviewer for constructive comments and suggestions. These can be very helpful to improve the quality of manuscript and also increase the readability.

We will firstly provide a point-by-point response to reviewer's comments in red font. Then the track of the changes and also the revised version of manuscript will be attached and named as "diff.pdf" and "IRTG-ESSD-v2-response.pdf", respectively.

Thank you.

Please note that reviewers' comments are in italics while our answers are not.

Yours sincerely, on behalf of the co-authors,

Qi Liu and Manuel Hernández-Pajares

# Answers to Anonymous Referee 1, essd-2021-136-RC1.pdf

**Comment R1.1** *This paper describes the four real-time GIM products by CAS, CNES, UPC, and WHU, as well as the real-time IGS GIM combination. The results are analyzed for one month at the beginning of 2021 by means of a comparison with Jason3 VTEC data and by the differential STEC technique. In particular, the paper focuses on the update of the UPC solution and its impact on the combined IGS solution. The topic is highly relevant, and the new UPC and IGS solutions justify publishing this contribution. The GIMs of the combined IGS solution are provided in the commonly used and well documented IONEX format and are therefore easily usable by the community. The data set including only one month is a bit limited, especially considering that it starts only one day before the switch of the UPC solution on January 4. In my opinion, the content of the manuscript is worth publishing, but the presentation requires substantial improvement concerning language, clarity of presentation, and consistency of mathematical expressions and equations, for which examples are given below.*

**Answer to R1.1** We thank the reviewer for the efficient and professional editing of our manuscript. We have tried to summarize as well in this manuscript the computation methods of IGS RT-GIMs and the accuracy of different real-time GIMs in Jason3-VTEC assessment and dSTEC assessment, and also validate the effectiveness of real-time weighting technique for combination, the response of RT-GIM to geomagnetic storm, and the influence of temporal resolution on RT-GIM.

Following your suggestion, now we have extended the experiment. We add data one month before January 2021 and one month after January 2021 (from December 01 of 2020 to March 01 of 2021). The new results are similar and consistent with previous experiment. Fig. 3, Fig. 5. and Table 4 have been reproduced and the corresponding descriptions have been changed. In particular, the overall standard deviation of upc1 VTEC versus measured Jason3-VTEC drops from 4.3 to 2.7 TECU and, in agreement with that, the standard deviation of irtg VTEC versus measured Jason3-VTEC decreases from 3.3 to 2.8 TECU. Accordingly, the description of the figures and tables has also been modified. As shown and explained in Eq. 4, the whu0 is shifted by 0 hours. To see the influence of phase-shifted  $\lambda_{S,t}$ , the whu0 is manually shifted by 2 hours (i.e., take  $t_0$  as 2 hours for whu0 in Eq.4) in post-processing mode. As can be seen in Fig. 3 and Table 4, the 2-hour shifted WHU RT-GIM (whu1) is slightly better than whu0.

**Comment R1.2** *The mathematical expressions throughout the entire paper are very inconsistent, incomplete, and also incorrect, e.g.*

**Answer to R1.2** Sorry for the misleading and many thanks for your kind suggestions. Because the article joins the products of different centers, we have preserved the notation of the original contributions in order to facilitate the references to the original articles in the first version of manuscript.

Now all the equations are reorganized and the symbols are unified.

**Comment R1.3** *The parameters should have consistent indexes, e.g., in (1)  $P$ ,  $L$ , and  $STEC$  have no indexes in the first two lines, but then  $P$  and  $L$  have a time index  $k$  in the last line (whereas  $STEC$  and  $\Phi$  do not). The biases, however, have a satellite and receiver index. Later in (4), the  $STEC$  has indexes for  $r$  and  $s$ , and depends on latitude, longitude, time, and zenith angle (which doesn't make sense by itself, as receiver+satellite and time uniquely define the  $STEC$  parameter, the other dependencies are superfluous). In (7), the observations and VTEC values explicitly depend on time via  $\dots(t)$ , which is again a different representation compared to a subscript.*

**Answer to R1.3** Now equation (1) is split into three equations.  $k$  is the length of smoothing arc from beginning epoch to epoch  $t$ . And the time index  $t$  is added at each necessary variable. The unnecessary indexes in equation (4) are remove. The time indexes in equation (7) are unified as  $t$  in subscript.

**Comment R1.4** (2) is just a copy of the second line of (1), so why is it repeated?

**Answer to R1.4** Yes. The initial intention of equation (2) is to represent the LI in a separate equation to avoid confusion. But it seems not very clear. Now the previous equation (1) is split into three equations to avoid duplication.

**Comment R1.5**  $c$  is used as the speed of light in L86, but in (4) it is a different constant that is not defined.

**Answer to R1.5** Sorry for this contradictory definition. The definition of  $c$  has been modified.

**Comment R1.6** The symbol for the VTEC is mostly VTEC, but sometimes  $V$  (5,7).

**Answer to R1.6** Now all the symbols of VTEC are unified.

**Comment R1.7** In (6) in the last line the authors summarize over  $i$ , which means the result cannot depend on  $i$ , so this equation cannot be correct.

**Answer to R1.7** Sorry for the misleading. Now the equation is modified.

**Comment R1.8** In (7), the VTEC depends on  $t$ , so  $\delta$  should also depend on  $t$ .

**Answer to R1.8** Yes, you're right. Now this has been modified.

**Comment R1.9**  $N$  is used in the paper as the number of ACs, the number Jason3 VTEC points during one day, the number of dSTEC points, and the maximum degree of the spherical harmonics, which should be avoided to facilitate the readability.

**Answer to R1.9** Thanks for your suggestion. Now the symbol of  $N$  are defined in different forms to avoid misleading.

**Comment R1.10** Why is the phase wind-up term  $\Phi$  introduced in (1) and (2), when it is simply ignored afterwards? This is an a-priori correction similar to antenna PCVs and not a parameter, and should therefore not be listed, or at least it should be explained how it is treated.

**Answer to R1.10** Yes, the phase wind-up is defined in Equation (1) and (2). Later in remaining equations, we only use VTEC extracted from Equation (1) and (2). Now we removed the wind-up item in the equation and noted the wind-up in the description.

**Comment R1.11** Taking the SQUARE of the ROOT-mean-square in (6) is a bit pointless and simply is the mean-square.

**Answer to R1.11** Sorry for the misleading. Now we replace " $t_i$  is the inverse of the squared RMS of RT-dSTEC error  $RMS_{\delta,i}^2$  and  $\delta_i$  is the RT-dSTEC error of IGS center  $i$  in the RT-dSTEC assessment."

with

" $RMS_{\delta,g,t}$  is the root mean square of RT-dSTEC error.  $I_{g,t}$  is the inverse of the mean square of RT-dSTEC error.  $N_t$  is the number of RT-dSTEC observations from the beginning epoch to current epoch  $t$ .  $\delta_{g,i}$  is the RT-dSTEC error of RT-GIM  $g$  in the RT-dSTEC assessment."

**Comment R1.12** *The presentation generally is too unclear and unprecise, and should be revised in this regard, e.g.: - L10 'after the transition of interpolation technique': This cannot be understood at this point, as this is only explained later.*

**Answer to R1.12** Thank for your kind suggestion. 'after the transition of interpolation technique' has been replace by "after the improvement of interpolation technique".

**Comment R1.13** *L25 'due to the good performance and global distribution of VTEC': What is the performance of VTEC?*

**Answer to R1.13** Sorry for the misleading, "the good performance" was supposed to mean the high accuracy. Now we replace "Due to the good performance and global distribution of VTEC" with

"Due to the high quality and global distribution of VTEC estimation".

**Comment R1.14** *L57: RTK over medium and long baselines can also achieve centimeter level without any ionospheric information, it might just take longer.*

**Answer to R1.14** Sorry for the misleading. We meant the instantaneous (single-epoch) RTK over medium and long-baseline. For instantaneous (single-epoch) RTK over medium and long-baseline, the ionospheric information is able to increase the success rate and reliability.

Now, we replace "while the Real-Time Kinematic (RTK) Positioning over medium and long-baseline is able to achieve few centimeters level for rover stations"

with

"while the instantaneous (single-epoch) Real-Time Kinematic (RTK) Positioning over medium and long-baseline is able to obtain higher success rate of the ambiguity fixing and reliability for rover stations in few centimeters level"

**Comment R1.15** *It is often stated that the 'STEC is extracted from the GF combination'. This is not correct. This is the STEC biased by ambiguities or DCBs. The unbiased STEC can only be obtained by fitting an ionospheric model to the observations. This should be made more precise.*

**Answer to R1.15** Thank you for your kind suggestion. The original expression might be misleading.

Now we add the sentence "It should be noted that extraction of STEC in an unbiased way can be obtained by fitting an ionospheric model to the observations." at the beginning of Section 2.1 to define the extraction of unbiased STEC.

Then we replace "The geometry-free (GF) combination of pseudorange and carrier phase observations is formed to extract STEC within a continuous arc."

with

" The geometry-free (GF) combination of pseudorange and carrier phase observations is formed to extract STEC and DCB in an unbiased way by fitting an ionospheric model (for example, spherical harmonic model)."

**Comment R1.16** *L96 'Since ... adopts spherical harmonic expansion...': This is not the reason that some ACs use the spherical harmonic model.*

**Answer to R1.16** Sorry for the misleading. Now we replace "Since the dissemination of RT-GIMs adopts spherical harmonic expansions, some ionosphere centers (CAS, CNES, WHU) directly estimate spherical harmonic coefficients in sun-fixed reference frame as Eq. 3"

with

”Some ionosphere centers (CAS, CNES, WHU) directly estimate and disseminate spherical harmonic coefficients in sun-fixed reference frame as Eq. 4”.

**Comment R1.17** *The description of the CAS method should be more clear. What I currently understand is that they compute local VTEC models, then transform the VTEC to STEC, then back to VTEC, and then estimate a global model. Is this really the case?*

**Answer to R1.17** Sorry for the misleading. Actually, the local VTEC model is used for the DCB estimation. As we written ”The Eq. 1 and Eq. 4 from 130 global stations are combined to calculate real-time line-of-sight STEC, which is then converted to VTEC with an ionospheric mapping function in single-layer assumption at 450 km.” in the manuscript, the real-time STEC is computed by  $\tilde{P}_{GF,k} - c \cdot (D_r + D^s)$  and the STEC is converted into VTEC by means of mapping function. With the global distributed VTEC, the spherical harmonic model is used for global VTEC modelling. In addition, the extra predicted ionospheric information is introduced, as mentioned in the paper ”CAS predicted TEC information is also included for RT-GIM computation”.

Maybe the sentences are not very clear. Now we replace ”The Eq. 1 and Eq. 4 from 130 global stations are combined to calculate real-time line-of-sight STEC, which is then converted to VTEC with an ionospheric mapping function in single-layer assumption at 450 km. The VTEC is directly modeled in a solar-geographic reference frame as Eq. 3. To mitigate the impacts of the unstable real-time data streams, e.g. the sudden interruption of the data streams, CAS predicted TEC information is also included for RT-GIM computation”

with

”The real-time STEC is computed by subtracting estimated DCB in Eq. 3 from  $\tilde{P}_{GF,t}$  in Eq. 1 and the STEC is converted into VTEC by means of mapping function. The real-time VTEC is directly modeled in a solar-geographic reference frame as Eq. 3. To mitigate the impacts of the unstable real-time data streams, e.g. the sudden interruption of the data streams, CAS predicted TEC information is also included for RT-GIM computation. The broadcasted CAS RT-GIM is computed by the weighted combination of real-time spherical harmonic coefficients and predicted ionospheric information.”

**Comment R1.18** *I cannot follow the description of the UPC method in L148 and following, maybe this could be presented in a more intuitive way. In (5) it is stated that  $G_t$  is the generated RT-GIM.  $G_t$  seems to be a vector, but a GIM is a set of grid points characterized with latitude, longitude, time, and VTEC value.  $D_t$  is simply defined as ’dictionary matrix’. Either all of this should be explained or simply described in a clear way, since the reference is given.*

**Answer to R1.18** We apologize for the lack of clarity. We have introduced the following modification:

The intuition behind the method is the following, we construct a linear combination of past maps which at the IPP are most similar to our measures. For mathematical convenience, we represent each 2-D GIM as a 1-D vector (I.e., the columns are stacked along the meridian in order to create a vector of all the grid points of the map). This is justified because the measure of similarity is done over cells of  $2.5 \times 5.0$  degrees in the maps, and therefore the underlying  $\mathbb{R}^2$  (coordinate space of dimension 2) structure is not relevant for computing euclidean distances in  $\ell_2$  norm. The method for obtaining the coefficients of the linear combination of past maps is based on equations (6), which were first introduced in the problem of face recognition. The problem of face recognition has in common with the current problem that there are occlusions in the face image/ionospheric

map, that is the regions not covered by stations or the effect of glasses. These effects have to be taken into account when selecting the past maps, and should not introduce a bias and this is done by using the double norm criterion of equation (6).

The new writing of the paragraph would be:

We replace "ADIGIM, assuming that the global profile of ionospheric electron content performs spatial-temporal similarities, models the interpolation as the sparse representation of good-quality historical GIMs (e.g. UQRG) over last two solar cycles. Based on the atomic decomposition and the least absolute shrinkage and selection operator (LASSO), the modelling is to find a minimization problem regarding VTEC measurement and estimates which is a combination of an approximation error by norm  $\ell_2$ , along with a  $\ell_1$  penalization on the approximation coefficients inducing sparsity" with

"Since the global ionospheric electron content mainly depends on the diurnal, seasonal, and solar variation, ADIGIM is computed by the weighted combination of good-quality historical GIMs (e.g. UQRG) with similar ionosphere conditions. The database of historical GIMs cover the last two solar cycles since 1998. The method for obtaining the weights of the linear combination of past maps is based on Eq. 6, which was first introduced in the problem of face recognition n (Wright et al., 2008, 2010). While the face recognition is affected by the occlusions (such as glasses) in the face image, the reconstruction of GIM has problems in the regions that are not covered by GNSS-stations. The problems have to be taken into account when selecting the past maps for combination, and should not introduce a bias. As shown in Eq. 6, the problem is solved by introducing  $\ell_2$  norm and  $\ell_1$  norm. The property of the atomic decomposition and the least absolute shrinkage and selection operator (LASSO) is that it can select a small set of past maps which are the most similar to the real-time measured VTEC at IPPs. The ADIGIM technique minimizes the difference between observed unbiased VTEC measurement and weighted VTEC from historical UQRG in similar ionosphere conditions. The underlying assumption is that the VTEC distribution over the areas not covered by the IPPs can be represented by the elements of the historical library of UQRG".

We also replace "where  $G_t$  is the generated RT-GIM.  $D_t$  is the dictionary matrix of historical UQRG database.  $\tilde{\alpha}_t$  is the estimated weight vector.  $V(x, y)$  is the observed VTEC at IPP.  $D_t^I$  is the VTEC extracted at IPP from historical GIM database.  $\alpha_t$  is the unknown weight vector of each historical GIM.  $\ell_2$  is the norm for minimizing the euclidean distance between current VTEC measurements and historic ones.  $\ell_1$  is the regularization norm for penalizing the approximation coefficients and  $\rho$  controls the sparsity of solution." with

"where  $VTEC_{I,t}$  is the observed VTEC at IPP of epoch  $t$ . It is assumed that  $VTEC_{I,t}$  can be approximated by  $D_{g,I,t}$  and  $\alpha_t$ , while  $D_{g,I,t}$  is the VTEC extracted at IPP from historical databases of GIM  $g$  (For UPC, the UQRG is used) and  $\alpha_t$  is the unknown weight vector of each historical GIM at epoch  $t$ .  $\tilde{\alpha}_t$  is the estimated weight vector of each selected UQRG at epoch  $t$ . The estimated weight vector  $\tilde{\alpha}_t$  is obtained by LASSO regression method with loss function norm  $\ell_2$  and regularization norm  $\ell_1$ .  $\ell_2$  is the norm for minimizing the euclidean distance between observed VTEC measurements and historical UQRG databases at epoch  $t$ .  $\ell_1$  is the regularization norm for penalizing the approximation coefficients to limit the number of UQRG involved in the estimation and  $\rho$  controls the sparsity of solution.  $G_t$  is the generated UPC RT-GIM of epoch  $t$  and is the weighted combination of historical UQRG. For mathematical convenience, each 2-D GIM is reformed as a 1-D vector (I.e., the columns are stacked along the meridian in order to create a vector of all the grid points of the map). This is justified because the measure of similarity is

done over cells of  $2.5 \times 5.0$  degrees in the maps, and therefore the underlying  $\mathbb{R}^2$  (coordinate space of dimension 2) structure is not relevant for computing euclidean distances in  $\ell_2$  norm.  $D_t$  is the selected historical UQRG databases with similar ionosphere conditions at epoch  $t$ ”

By the way, more details can be see in the origin manuscript and it is now available online <https://doi.org/10.1007/s00190-021-01525-5>.

**Comment R1.19** *Figure 5 is difficult to read, maybe a smoothed representation would help?*

**Answer to R1.19** In order to smooth the Figure 5, we firstly change the zoom period in the top Figure 5(a). Now only real-time weights during 4 days are available to focus on the weight transition from USRG to UADG. Then we try to plot the daily winning epochs of RT-GIMs in Figure 5(b) from December 01 of 2020 to March01 of 2021 to avoid the noisy evolution of weight in long-time period. For each RT-GIM, the number of daily winning epochs is computed by counting the number of epochs within the day when the one RT-GIM is better than the other RT-GIMs.

**Comment R1.20** *L296 'RT-weighting ... turns out to be effective': What does this mean? Effective for what?*

**Answer to R1.20** Sorry for the ambiguous expression. Now we replace ”The RT-weighting technique for the generation of IGS combined RT-GIM turns out to be effective” with

”The RT-weighting technique for the generation of IGS combined RT-GIM is performing well”

**Comment R1.21** *The language of the paper as well as some technical aspects should be carefully revised, e.g., missing articles should be added, sentences that are only equations (L86) should be avoided, and abbreviations have to be defined at first use (GIM in L10, but used in L3, VTEC is used in L23, but TEC is defined in L26, SHE is defined in L166 but only used within this paragraph, outside the full expression is used,...).*

**Answer to R1.21** Many thanks for your kind suggestions. We have just updated the reference articles including the missing articles and also a recent accepted article about UADG.

Now the sentences that are only equations has been modified.

In L3, we use RT-GIM and RT-GIM is defined in L3. Following the requirement of journal ”Abbreviations need to be defined in the abstract and then again at the first instance in the rest of the text.”, we define abbreviation the first time when we use it in a sentence at the abstract and main text. Now all the abbreviations are reorganized and redefined.
