# Supplementary material for: The cooperative IGS RT-GIMs: a global and accurate estimation of the ionospheric electron content distribution in real-time
Source: Copernicus journal article supplement (doi:10.5194/essd-2021-136), 2021-05-04
Supplement: Supplementary file [file essd-2021-136-AC1-supplement.zip]

# The cooperative IGS RT-GIMs: a ~~global and accurate estimation~~ reliable estimation of the global ionospheric electron content distribution in real-time

Qi Liu<sup>1</sup>, Manuel Hernández-Pajares<sup>1,2</sup>, Heng Yang<sup>3,1</sup>, Enric Monte-Moreno<sup>4</sup>, David Roma-Dollase<sup>2</sup>, Alberto García-Rigo<sup>1,2</sup>, Zishen Li<sup>5</sup>, Ningbo Wang<sup>5</sup>, Denis Laurichesse<sup>6</sup>, Alexis Blot<sup>6</sup>, Qile Zhao<sup>7,8</sup>, Qiang Zhang<sup>7</sup>, André Hauschild<sup>9</sup>, Loukis Agrotis<sup>10</sup>, Martin Schmitz<sup>11</sup>, Gerhard Wübbena<sup>11</sup>, Andrea Stürze<sup>12</sup>, Andrzej Krankowski<sup>13</sup>, Stefan Schaer<sup>14,15</sup>, Joachim Feltens<sup>16</sup>, Attila Komjathy<sup>17</sup>, and Reza Ghoddousi-Fard<sup>18</sup>

<sup>1</sup>Universitat Politècnica de Catalunya (UPC-IonSAT), Barcelona, Spain.

<sup>2</sup>Institut d'Estudis Espacials de Catalunya (IEEC), Barcelona, Spain.

<sup>3</sup>School of Electronic Information and Engineering, Yangtze Normal University, 408100 Chongqing, China.

<sup>4</sup>Department of Signal Theory and Communications, TALP, Universitat Politècnica de Catalunya, 08034 Barcelona, Spain.

<sup>5</sup>Aerospace Information Research Institute (AIR), Chinese Academy of Sciences (CAS), Beijing, China.

<sup>6</sup>Centre National d'Etudes Spatiales, Toulouse, France.

<sup>7</sup>GNSS Research Center, Wuhan University, No. 129 Luoyu Road, Wuhan 430079, China.

<sup>8</sup>Collaborative Innovation Center of Earth and Space Science, Wuhan University, No. 129 Luoyu Road, Wuhan 430079, China.

<sup>9</sup>German Aerospace Center (DLR), German Space Operations Center (GSOC), 82234 Wessling, Germany.

<sup>10</sup>European Space Operations Center, European Space Agency, Darmstadt, Germany.

<sup>11</sup>Geo++ GmbH, Steinriede 8, 30827 Garbsen, Germany.

<sup>12</sup>BKG, Federal Agency for Cartography and Geodesy, Frankfurt, Germany.

<sup>13</sup>Space Radio-Diagnostics Research Centre, University of Warmia and Mazury in Olsztyn, 10-719 Olsztyn, Poland.

<sup>14</sup>Astronomical Institute of the University of Bern, Sidlerstrasse 5, Bern 3012, Switzerland.

<sup>15</sup>Federal Office of Topography (swisstopo), Wabern, Switzerland.

<sup>16</sup>Navigation Support Office, Telespazio Germany GmbH c/o European Space Agency/European Space Operations Centre, Robert-Bosch-Strasse 5, 64293 Darmstadt, Germany

<sup>17</sup>Near Earth Tracking Systems Group (335S), NASA - Jet Propulsion Laboratory, California Institute of Technology, 4800 Oak Grove Drive, M/S 138-317, Pasadena, CA 91109, USA.

<sup>18</sup>Canadian Geodetic Survey, Natural Resources Canada, Ottawa, Canada.

**Correspondence:** Manuel Hernández-Pajares (manuel.hernandez@upc.edu)

**Abstract.** The Real-Time Working Group (RTWG) of the International GNSS Service (IGS) is dedicated to providing high-quality data, high-accuracy products for Global Navigation Satellite System (GNSS) positioning, navigation, timing, and Earth observations. As one part of real-time products, the IGS combined Real-Time Global Ionosphere Map (RT-GIM) has been generated by the real-time weighting of the RT-GIMs from IGS real-time ionosphere centers including the Chinese Academy of Sciences (CAS), Centre National d'Etudes Spatiales (CNES), Universitat Politècnica de Catalunya (UPC), and Wuhan University (WHU). The performance of global Vertical Total Electron Content (VTEC) representation in all of the RT-GIMs has been assessed by VTEC from Jason3-altimeter during ~~one-month~~ three months over oceans and dSTEC-GPS technique with 2-day observations over continental regions. According to the Jason3-VTEC and dSTEC-GPS assessment, the real-time

weighting technique is sensitive to the accuracy of RT-GIMs. Compared with the performance of post-processed rapid Global Ionosphere Maps (GIMs) and IGS combined final GIM (igsf) during the testing period, the accuracy of UPC RT-GIM (after the ~~transition-improvement~~ of interpolation technique) and IGS combined RT-GIM (IRTG) is equivalent to the rapid GIMs and reaches around 2.7 and 3.0 TECU (TEC Unit,  $10^{16}\text{el/m}^2$ ) over oceans and continental regions, respectively. The accuracy of CAS RT-GIM and CNES RT-GIM is slightly worse than the rapid GIMs, while WHU RT-GIM requires a further upgrade to obtain similar performance. In addition, the strong response to the recent geomagnetic storms has been found in the Global Electron Content (GEC) of IGS RT-GIMs (especially UPC RT-GIM and IGS combined RT-GIM). The IGS RT-GIMs turn out to be reliable sources of real-time global VTEC information and have great potential for real-time applications including range error correction for transionospheric radio signals (~~such as GNSS positioning, search and rescue, air traffic, radar altimetry, and radioastronomy~~), the monitoring of space weather (~~such as geomagnetic and ionospheric storms, ionospheric disturbance~~) and detection of natural hazards on a global scale (~~such as hurricanes/typhoons, ionospheric anomalies associated with earthquakes~~).

All the IGS combined RT-GIMs generated and analyzed during the testing period are available at <http://doi.org/10.5281/zenodo.5042622> (Liu et al., 2021b).

## 1 Introduction

The ~~GIMs, containing VTEC~~ Global Ionosphere Maps (GIMs), containing Vertical Total Electron Content (VTEC) information at given grid points (typically with a spatial resolution of 2.5 degrees in latitude and 5 degrees in longitude) have been widely used in both scientific and technological communities (Hernández-Pajares et al., 2009). Due to the ~~good performance~~ high quality and global distribution of VTEC estimation, GIM has been applied to investigating the behavior of the ionosphere, such as the climatology of mean Total Electron Content (TEC), ionospheric anomalies before earthquakes, semiannual variations of TEC in ionosphere, the VTEC structure of polar ionosphere under different cases, W-index for ionospheric disturbance warning (e.g., Liu et al., 2009, 2006; Zhao et al., 2007; Hernández-Pajares et al., 2020; Gulyaeva et al., 2013) (e.g., Liu et al., 2009, 2006; Zhao et al., 2007).

In addition, the high accuracy of GIM enables precise range corrections for transionospheric radio signals including radar altimetry, radio telescopes, and ~~GNSS positioning~~ (e.g., Komjathy and Born, 1999; Fernandes et al., 2014; Sotomayor-Beltran et al., 2013; Liu et al., 2015) Global Navigation Satellite System (GNSS) positioning (e.g., Komjathy and Born, 1999; Fernandes et al., 2014; Sotomayor-Beltran et al., 2013).

The Center for Orbit Determination in Europe (CODE), European Space Agency (ESA), Jet Propulsion Laboratory (JPL), and ~~UPC~~ Universitat Politècnica de Catalunya (UPC) agreed on the computation of individual GIMs in IONosphere map EXchange (IONEX) format, and created the Ionosphere Working Group (Iono-WG) of the International GNSS Service (IGS) at 1998 (Schaer et al., 1996, 1998; Feltens and Schaer, 1998; Feltens, 2007; Mannucci et al., 1998; Hernández-Pajares et al., 1998, 1999). In the IGS 2015 workshop, ~~CAS~~ Chinese Academy of Sciences (CAS), Canadian Geodetic Survey of Natural Resources Canada (NRCan) and ~~WHU~~ Wuhan University (WHU), became new Ionospheric Associate Analysis Centers (IAACs) (Li et al., 2015; Ghoddousi-Fard, 2014; Zhang et al., 2013b). Currently, there are three types of post-processed IGS GIMs at different latencies: final, rapid, and predicted GIMs. With the contribution from different IAACs, the final and rapid GIMs are assessed and combined by corresponding weights and uploaded to ~~FTP or HTTP~~ File Transfer Protocol (FTP) or Hypertext

[Transfer Protocol \(HTTP\)](#) servers with the latency of 1-2 weeks and 1-2 days, respectively. The 1-day and 2-day predicted GIMs can provide valuable VTEC information in advance for ionospheric activities and corrections. However, the accuracy of predicted GIMs is limited due to the nonlinear variation of ionosphere and the lack of real-time ionospheric observations

45 (Hernández-Pajares et al., 2009; García-Rigo et al., 2011; Li et al., 2018).

In order to satisfy the growing demand for real-time GNSS positioning and applications, [RTWG-Real-Time Working Group \(RTWG\)](#) of IGS was established in 2001 and officially started to provide Real Time Service (RTS) in 2013 ([Caissy et al., 2012](#)) ([Caissy et al., 2012](#); [Elsobeiey and Al-Harbi, 2016](#)). Aside from multi-GNSS real-time ([RT](#)) data streams, the IGS-RTS also generates RT-GNSS products streams, including satellite orbits, clocks, code/phase biases, and GIM. These high-quality IGS-

50 RTS products enable precise GNSS positioning, navigation, timing (PNT), ionosphere monitoring, and hazard detection. In [RTCM-Radio Technical Commission for Maritime Services \(RTCM\)](#) Special Committee (SC-104), the State Space Representation (SSR) correction data format is defined as the standard message (RTCM-SSR) for real-time GNSS applications. In support of flexible multi-GNSS applications within current multi-constellation and multi-frequency environments, a new format (IGS-SSR) is developed. The dissemination of IGS [Real-Time Global Ionosphere Maps \(RT-GIMs\)](#) adopts spherical harmonic

55 ([SH](#)) expansion to save the bandwidth in both RTCM-SSR and IGS-SSR format ([IGS, 2020](#)) ([RTCM-SC, 2014](#); [IGS, 2020](#)).

The accuracy of RT-GIMs is typically worse than post-processed GIMs due to the short span of ionospheric observations, sparse distribution of stations, higher noises in carrier-to-code leveling, or difficulty in carrier ambiguity estimation in real-time processing mode. While RT-GIMs perform slightly worse than post-processed GIMs, it is found that RT-GIMs are helpful to reduce the convergence time of dual-frequency Precise Point Positioning (PPP) and strengthen the solution (Li et al., 2013). With

60 the corrections of RT-GIMs, the accuracy of single-frequency PPP reaches decimeter and meter level in horizontal and vertical directions (Ren et al., 2019), while the [instantaneous \(single-epoch\)](#) Real-Time Kinematic (RTK) Positioning over medium and long-baseline is able to [achieve few centimeters level obtain higher success rate of the ambiguity fixing and reliability](#) for rover stations [in few centimeters level](#) (Tomaszewski et al., 2020). In addition, the feasibility of ionospheric storm monitoring based on RT-GIMs is tested (García Rigo et al., 2017). A first fusion of IGS-GIMs and ionosondes data from the Global Ionosphere

65 Radio Observatory (GIRO) paves the way for the improvement of real-time International Reference Ionosphere (Froñ et al., 2020). Currently, the routine RT-GIMs are available from CAS, [CNES Centre National d'Etudes Spatiales \(CNES\)](#), German Aerospace Center in Neutrelitz (DLR-NZ), [JPL](#), UPC, WHU, and [JPL](#) ([Li et al., 2020](#); [Laurichesse and Blot, 2015](#); [Jakowski et al., 2011](#); [IONOLAB](#) ([Li et al., 2020](#); [Laurichesse and Blot, 2015](#); [Jakowski et al., 2011](#); [Hoque et al., 2019](#); [Komjathy et al., 2012](#); [Roma Dollase et al.](#)).

Individual RT-GIMs from different IGS centers can be gathered from IGS-RTS by means of Network Transportation of RTCM

70 by Internet Protocol (NTRIP) (Weber et al., 2007). With the contribution of IGS RT-GIMs from CAS, CNES and UPC, a first IGS real-time combination of GIMs was generated in 2018 (Roma-Dollase et al., 2018a).

Recently, one of the IGS RT-GIMs (UPC-IonSAT) has completely changed the [RT-interpolation-real-time interpolation](#) strategy, with a significant improvement. In addition, the number of contributing centers has been increased from 3 to 4, thanks to the participation of Wuhan University. A new version of [IRTG-IGS combined RT-GIM \(IRTG\)](#) has been developed to improve

75 the performance and also adapt to the newly updated IGS-SSR format. In addition, the developed software has been further parallelized to decrease the latency of IRTG computation to a few minutes (Tange, 2011). This paper summarizes the compu-

tation methods of IGS RT-GIMs from different ionosphere centers and the generation of IRTG. In addition, the performance of different RT-GIMs and real-time weighting technique is shown and discussed. The conclusions and future improvements are given in the final section.

## 80 2 Data and methods

### 2.1 Real-time GNSS data processing

In order to generate RT-GIMs, the real-time GNSS observations from worldwide stations are received and transformed into Slant TEC (STEC). It should be noted that extraction of STEC in an unbiased way can be obtained by fitting an ionospheric model to the observations. With the global distributed STEC, different strategies are chosen for the computation of RT-GIMs.

85 Currently, two methods are commonly used for the calculation of real-time STEC. The first method is the so-called Carrier-to-Code Levelling (CCL) as shown in Eq. 43 (Ciraolo et al., 2007; Zhang et al., 2019). The geometry-free (GF) combination of pseudorange and carrier phase observations is formed to extract STEC ~~within a continuous arc~~ and DCB in an unbiased way by fitting an ionospheric model (for example, spherical harmonic model). Due to the typically shorter phase-arc length in real-time mode, the impact of multipath and thermal noise is higher than in post-processing mode (Li et al., 2020).

$$90 \quad \underline{P_{GF,t} \equiv P_{2,t} - P_{1,t} = \alpha_{GF} \cdot STEC_t + c \cdot (D_r + D^s) + \epsilon_M + \epsilon_T} \quad (1)$$

$$\underline{L_{GF,t} \equiv L_{1,t} - L_{2,t} = \alpha_{GF} \cdot STEC_t - B_{GF}} \quad (2)$$

$$\underline{\tilde{P}_{GF,t} \equiv L_{GF,t} - \frac{1}{k} \sum_{i=1}^k (L_{GF,i} - P_{GF,i}) \approx \alpha_{GF} \cdot STEC_t + c \cdot (D_r + D^s)} \quad (3)$$

95 where  $P_{1,t}$  and  $P_{2,t}$  are the pseudorange observations of epoch  $t$  at first and second frequency, respectively.  $\alpha \approx 40.3 \left( \frac{1}{f_2^2} - \frac{1}{f_1^2} \right) \alpha_{GF}$  can be approximated as  $40.3 \left( \frac{1}{f_2^2} - \frac{1}{f_1^2} \right)$ .  $f_1$  and  $f_2$  are the first and second frequency of observation.  $STEC_t$  is the STEC of epoch  $t$ .  $r$  is receiver and  $s$  is satellite.  $c$  is the speed of light in vacuum.  $D_r$  and  $D^s$  are the receiver ~~DCB~~ Differential Code Biases (DCB) and satellite DCB.  $\epsilon_M$  and  $\epsilon_T$  are the code multipath error and thermal noise error.  $L_1$  and  $L_2$   ~~$L_{1,t}$  and  $L_{2,t}$~~  are the carrier phase observations including the priori corrections (such as wind-up term) of epoch  $t$  at first and second frequency.

100  $\beta = c \left( \frac{1}{f_2} - \frac{1}{f_1} \right)$ .  $\phi$  is the relative rotation between receiver and satellite antennas.  $B_{GF} = B_1 - B_2$   ~~$B_{GF}$  equals to  $B_1 - B_2$~~ , while  $B_1$  and  $B_2$  are the carrier phase ambiguities including the corresponding phase bias at first and second frequency, respectively.  ~~$P_{GF,i}$  and  $L_{GF,i}$  are the  $P_{GF}$  and  $L_{GF}$  at epoch  $i$  within continuous arc.~~  $k$  is the ~~smoothing arc length~~ and  ~~$\tilde{P}_{GF,k}$  length of smoothing arc from beginning epoch to epoch  $t$~~ , and  $\tilde{P}_{GF,t}$  represents the smoothed  $P_{GF}$  of epoch  $t$  which is significantly affected by the pseudorange multipath in real-time mode than in post-processing.

105 The second method is the GF combination of phase-only observations, and the  $B_{GF}$  is estimated together with the real-time TEC model (for example, described in terms of tomographic voxel-based basis functions) in Eq. 2 (Hernández-Pajares et al., 1997, 1999). Although the STEC from the second method is accurate and free of code multipath and thermal noise in post-processing, the convergence time can affect the accuracy of the STEC, most likely in the isolated receivers.

$$\underline{L_{GF} \equiv L_1 - L_2 = \alpha \cdot STEC - \beta \cdot \phi + B_{GF}}$$

110 In addition, the computation methods of RT-GIMs from different IGS real-time ionosphere centers were compared in detail at the next subsection and summarized in Table 1. ~~Since the dissemination of RT-GIMs adopts spherical harmonic expansions, some~~ Some ionosphere centers (CAS, CNES, WHU) directly estimate ~~and disseminate~~ spherical harmonic coefficients in sun-fixed reference frame as Eq. 4 (RTCM-SC, 2014; Li et al., 2020), while UPC generates the RT-GIM in IONEX format and transforms RT-GIM into spherical harmonic coefficients for the dissemination.

$$115 \quad \begin{cases} M_z = [1 - \sin^2 z / (1 + H_{ion}/R_E)^2]^{-\frac{1}{2}} \\ VTEC_t = STEC_t / M_z \\ VTEC_t = \sum_{n=0}^{N_{SH}} \sum_{m=0}^{\min(n, M_{SH})} P_{n,m}(\sin \varphi_I) \cdot (C_{n,m} \cos(m\lambda_{S,t}) + S_{n,m} \sin(m\lambda_{S,t})) \\ \lambda_{S,t} = (\lambda_I + (t - t_0) * \pi / 43200) \text{ modulo } 2\pi \end{cases} \quad (4)$$

where  $z$  is the satellite zenith angle,  ~~$M(z)$~~   $M_z$  is the mapping function between ~~STEC and VTEC~~  $STEC_t$  and  $VTEC_t$ .  $H_{ion}$  is the height of ionospheric single-layer assumption, and  $R_E$  is the radius of ~~earth~~ the earth.  $VTEC_t$  is the VTEC of epoch  $t$ .  $N_{SH}$  is the max degree of spherical harmonic expansion, and  $M_{SH}$  is the max order of spherical harmonic expansion.  $n, m$  are corresponding indices.  $P_{n,m}$  is the normalized associated Legendre functions.  $C_{n,m}, S_{n,m}$  are sine and cosine spherical harmonic coefficients.  $\varphi_I$  and  $\lambda_I$  are the geocentric latitude and longitude of Ionospheric Pierce Point (IPP).  ~~$\lambda_S$~~   $\lambda_{S,t}$  is the mean sun fixed and phase-shifted longitude of IPP ~~(of epoch  $t$  (typically shifted by 2 hours to approximate TEC maximum at 14:00 in local time)).~~  $t$  is the current epoch.  $t_0$  is a common reference of shifted hours, taken as ~~2-0~~ 0 hours in the present broadcasting and gathering of RT-GIMs from the four corresponding IGS centers.  $VTEC(\varphi_I, \lambda_S)$  is the VTEC at IPP location.  $N$  is the max degree of spherical harmonic expansion, and  $M$  is the max order of spherical harmonic expansion.  $n, m$  are corresponding indices.  $P_{n,m}$  is the normalized associated Legendre functions.  $C_{n,m}, S_{n,m}$  are sine and cosine spherical harmonic coefficients.  ~~$t$  is GPS time of computation epoch within the current day.~~ of RT-GIM for WHU and 2 hours for CAS, CNES, and UPC.

## 2.2 The computation of RT-GIMs by different IGS real-time ionosphere centers

The strategies for generating RT-GIMs differ between IGS ~~RT~~ real-time ionospheric analysis centers (ACs). In this subsection, a brief introduction on the generation of RT-GIMs from individual ACs as well as the strategy comparison between different ACs are given.

**Table 1.** The brief summary of different IGS RT-GIMs

| Agency<br>/GIM | Runing date                                                                 | Extra<br>ionospheric information                                              | DCB<br>computation                                                                               | GIM<br>computation                                                                                                                                                                          |
|----------------|-----------------------------------------------------------------------------|-------------------------------------------------------------------------------|--------------------------------------------------------------------------------------------------|---------------------------------------------------------------------------------------------------------------------------------------------------------------------------------------------|
| CAS            | Mid-2017<br>to present                                                      | 2-day predicted GIM as back-ground information                                | Estimated at the same time with local VTEC, and corrected by three-day aligned code bias         | Observations with predicted GIMs generate 15-degree spherical harmonic expansion GIM in solar-geographic frame                                                                              |
| CNES           | End-2014<br>to present (with an evolution of the spherical harmonic degree) | No                                                                            | Expected in a forthcoming version                                                                | 12-degree spherical harmonic expansion GIM which is generated in solar-geographic frame                                                                                                     |
| UPC<br>/URTG   | 2011-02-06<br>to 2019-09-08                                                 | 1-2 day rapid GIM UQRG as background information                              | optional                                                                                         | Tomographic model with kriging interpolation method and frozen rapid GIM (UQRG) as a priori model, which generates RT-GIM in sun-fixed geomagnetic frame                                    |
| UPC<br>/USRG   | 2019-09-08<br>to present                                                    | 1-2 day rapid GIM UQRG as background information                              | optional                                                                                         | Tomographic model with spherical harmonic interpolation method and frozen rapid GIM (UQRG) as a priori model, which generates RT-GIM in sun-fixed geomagnetic frame                         |
| UPC<br>/UADG   | 2021-01-04<br>to present                                                    | historical UQRG (since 1996) as <del>database</del> <a href="#">databases</a> | optional                                                                                         | Tomographic model adopting atomic decomposition and LASSO solution for the global interpolation with the help of historical GIMs (UQRG), which generates GIM in sun-fixed geomagnetic frame |
| WHU            | <del>2020-09-09</del><br><a href="#">2020-11-09</a><br>to present           | 2-day predicted GIM as back-ground information                                | Directly use the previous satellite and receiver DCB estimated simultaneously with WHU rapid GIM | Observations with predicted GIMs yield 15-degree spherical harmonic expansion GIM in solar-geomagnetic frame                                                                                |

### 2.2.1 Chinese Academy of Sciences

The post-processed GIM of CAS has been computed and uploaded to IGS since ~~2015–2015~~ (Li et al., 2015). A predicting-plus-modeling approach is used by CAS for the computation of RT-GIM (Li et al., 2020). CAS RT-GIM is generated with multi-GNSS, GPS and GLONASS L1+L2, BeiDou B1+B2 and Galileo E1+E5a ~~RT~~-real-time data streams, provided by the IGS and regional GNSS tracking network stations. The real-time differential code biases (DCB) are estimated as part of the local ionospheric VTEC modeling using a generalized trigonometric series (GTS) function as Eq. 5. And then three-day aligned biases are incorporated to increase the robustness of real-time DCBs (Wang et al., 2020).

$$\begin{cases} STEC_t = M_z \cdot VTEC_t + c \cdot (D^s + D_r) \\ VTEC_t = \sum_{i=0}^{i_{max}} \sum_{j=0}^{j_{max}} \left\{ E_{i,j} \cdot \varphi_d^i \cdot \lambda_d^j \right\} + \sum_{l=0}^{l_{max}} \{ C_l \cos(l \cdot h_t) + S_l \sin(l \cdot h_t) \} \\ h_t = 2\pi(t - 14)/T, \quad T = 24h \\ i_{max} = j_{max} = 2 \\ l_{max} = 4 \end{cases} \quad (5)$$

where  $r$  is receiver and  $s$  is satellite.  $\varphi_d$  and  $\lambda_d$  are the difference between IPP and station in latitude and longitude, respectively.  ~~$z$  is the satellite zenith angle,  $M(z)$  is the mapping function.  $n, m, k, i, j, l$  represent the degrees in the polynomials model and Fourier series expansion.  $E_{n,m}, C_k, S_k, E_{i,j}, C_l, S_l$  are unknown parameters.~~ The Eq. 4 and The real-time STEC is computed by subtracting estimated DCB in Eq. 5 from  $\tilde{P}_{GF,t}$  in Eq. 3 and then the STEC is converted into VTEC by means of mapping function. The real-time VTEC from 130 global stations are combined to calculate real-time line-of-sight STEC, which is then converted to VTEC with an ionospheric mapping function in single-layer assumption at 450 km. The VTEC global stations is directly modeled in a solar-geographic reference frame as Eq. 4. To mitigate the impacts of the unstable real-time data streams, e.g. the sudden interruption of the data streams, CAS predicted TEC information is also included for RT-GIM computation. The broadcasted CAS RT-GIM is computed by the weighted combination of real-time VTEC spherical harmonic coefficients and predicted ionospheric information (Li et al., 2020).

### 2.2.2 Centre National d'Etudes Spatiales

In the framework of the ~~Real-Time Service~~-RTS of the IGS, CNES computes global VTEC in real-time thanks to the CNES PPP-WIZARD project since 2014. The real-time VTEC is extracted by pseudorange and carrier phase GF combination as Eq. 4 with the help of mapping function. And the single-layer assumption in the mapping function adopts an altitude of 450 km above the Earth.

CNES also use spherical harmonic model for global VTEC representation, and the equation is the same as Eq. 4. Spherical harmonic coefficients are computed by means of a Kalman Filter and simultaneous STEC from 100 stations of the ~~RT-IGS~~ real-time IGS network. CNES started to broadcast RT-GIM at the end of 2014 and changed spherical harmonic degrees from 6 to 12 in May of 2017 (Laurichesse and Blot, 2015).



### 2.2.3 Universitat Politècnica de Catalunya

UPC has been providing daily GIMs in IONEX-format to IGS since 1998 (~~Hernández-Pajares et al., 1998, 1999~~)([Hernández-Pajares et al.,](#)

160 . In order to meet the demand of real-time GIM, UPC developed the Real-Time TOMographic IONosphere model software (RT-TOMION) and started to generate the UPC RT-GIM on February 6 of 2011. The phase-only GF combination as Eq. 2, is used for obtaining real-time STEC from around 260 stations, and a 4-D voxel-based tomographic ionosphere model is adopted for global electron content modeling. The ionosphere is divided into two layers in the tomographic model and the electron density of each voxel is estimated together with the ambiguity term  $B_{GF}$  by means of a Kalman filter in the sun-fixed reference  
165 frame. The estimated electron density is condensed at a fixed effective height (450 km) for the generation of a single-layer VTEC map, and then the VTEC interpolation method is adopted in a sun-fixed geomagnetic reference frame for filling the data gap on a global scale.

From 2011 to 2019, the kriging technique is selected by UPC for real-time VTEC interpolation. And the spherical harmonic model has been adopted by UPC since September 08 of 2019. Recently, a new interpolation technique, denoted as Atomic  
170 Decomposition Interpolator of GIMs (ADIGIM), has been developed. ~~ADIGIM, assuming that the global profile of~~ [Since the global](#) ionospheric electron content ~~performs spatial-temporal similarities, models the interpolation as the sparse representation mainly depends on the diurnal, seasonal, and solar variation, ADIGIM is computed by the weighted combination of good-quality historical GIMs (e.g. UQRG) over~~ [with similar ionosphere conditions. The database of historical GIMs cover the last two solar cycles](#) ~~-Based-on~~ [since 1998. The method for obtaining the weights of the linear combination of past maps is based](#)  
175 [on Eq. 6, which was first introduced in the problem of face recognition \(Wright et al., 2008, 2010\). While the face recognition is affected by the occlusions \(such as glasses\) in the face image, the reconstruction of GIM has problems in the regions that are not covered by GNSS-stations. The problems have to be taken into account when selecting the past maps for combination, and should not introduce a bias. As shown in Eq. 6, the problem is solved by introducing  \$\ell\_2\$  norm and  \$\ell\_1\$  norm. The property of the atomic decomposition and the least absolute shrinkage and selection operator \(LASSO\) ,the modelling is to find a minimization](#)  
180 ~~problem regarding~~ [is that it can select a small set of past maps which are the most similar to the real-time measured VTEC at IPPs. The ADIGIM technique minimizes the difference between observed VTEC measurement and estimates which is a combination of an approximation error by norm  \$\ell\_2\$ , along with a  \$\ell\_1\$  penalization on the approximation coefficients inducing sparsity \(?\)weighted VTEC from historical UQRG in similar ionosphere conditions. The underlying assumption is that the VTEC distribution over the areas not covered by the IPPs can be represented by the elements of the historical library of UQRG](#)  
185 [\(Yang et al., 2021\)](#). The UPC RT-GIM with the new technique is denoted as UADG and generated by Eq. 6. Due to the improvement provided by the UADG, the broadcasted UPC-GIM was changed from USRG to UADG on January 04 of 2021. In addition, the USRG and UADG are generated in real-time mode and saved in IONEX format at HTTP as shown in Table 1.

$$\begin{cases} VTEC_{I,t} \approx D_{g,I,t} \cdot \alpha_t \\ \tilde{\alpha}_t = \arg \min_{\alpha_t} \frac{1}{2} \|VTEC_{I,t} - D_{g,I,t} \cdot \alpha_t\|_{\ell_2} + \rho \|\alpha_t\|_{\ell_1} \\ G_t = D_t \tilde{\alpha}_t \end{cases} \quad (6)$$



where  $G_t$  is the generated RT-GIM.  $D_t$  is the dictionary matrix of historical UQRG database.  $\tilde{\alpha}_t$  is the estimated weight vector.  $V(x, y)$  VTEC $_{I,t}$  is the observed VTEC at IPP.  $D_{g,I,t}$  is the VTEC extracted at IPP from historical GIM database.  $\alpha_t$  is the unknown weight vector of each historical GIM at epoch  $t$ .  $\tilde{\alpha}_t$  is the estimated weight vector of each selected UQRG at epoch  $t$ . The estimated weight vector  $\tilde{\alpha}_t$  is obtained by LASSO regression method with loss function norm  $\ell_2$  and regularization norm  $\ell_1$ .  $\ell_2$  is the norm for minimizing the euclidean distance between VTEC measurements and historical UQRG databases at epoch  $t$ .  $\ell_1$  is the regularization norm for penalizing the approximation coefficients to limit the number of UQRG involved in the estimation and  $\rho$  controls the sparsity of solution.  $G_t$  is the generated UPC RT-GIM of epoch  $t$  and is the weighted combination of historical UQRG. For mathematical convenience, each 2-D GIM is reformed as a 1-D vector (I.e., the columns are stacked along the meridian in order to create a vector of all the grid points of the map). This is justified because the measure of similarity is done over cells of  $2.5 \times 5.0$  degrees in the maps, and therefore the underlying  $\mathbb{R}^2$  (coordinate space of dimension 2) structure is not relevant for computing euclidean distances in  $\ell_2$  norm.  $D_t$  is the selected historical UQRG databases with similar ionosphere conditions at epoch  $t$ .

### 2.2.4 Wuhan University

The daily rapid and final GIM products have been generated with WHU new software named GNSS Ionosphere Monitoring and Analysis Software (GIMAS) since 21 June 2018 (Zhang and Zhao, 2018). At the end of the year 2020, WHU has also published a first RT-GIM product.

WHU uses the ~~Spherical Harmonic Expansion (SHE)~~ spherical harmonic expansion model and the formula is identical to Eq. 4. Currently, only the GPS real-time data streams from about 120 globally distributed IGS stations are used. The double frequency code and carrier phase observations with a cut-off angle of 10 degrees are used to gather precise geometry-free ionospheric data with the CCL method as Eq. 4-3 and ionospheric mapping function with the layer height of 450 km. In order to avoid the influence of satellite and receiver DCB on ionospheric parameters estimation, WHU directly uses the previous estimated DCB from WHU rapid GIM product. According to previous experience, the real-time data is not enough to model the ionosphere precisely on a global scale with ~~SHE~~ spherical harmonic expansion technique. Considering the lack and the uneven distribution of the GPS-derived ionospheric data, 2-day predicted GIM as external ionospheric information is also incorporated. It is important to balance the weight between the real-time data and the background information. Both the RT-GIM quality and the root mean square (RMS) map are influenced by the weight (Zhang and Zhao, 2019).

In the year 2021, WHU is going to focus on how to further improve the accuracy of RT-GIM and update the computation method. The precise WHU RT-GIMs with multi-GNSS data and the application of WHU RT-GIM in the GNSS positioning as well as space physics domain, are expected as next steps.

### 2.3 The combination of IGS RT-GIMs

Thanks to the contribution of the initial IGS real-time ionosphere centers (CAS, CNES, and UPC) and globally distributed real-time GNSS stations, the first experimental IRTG was generated by means of [Real-Time dSTEC](#) (RT-dSTEC) weighting

technique (normalized inverse of the squared RMS of RT-dSTEC error) in October 2018 (Roma-Dollase et al., 2018a; Li et al., 2020). Recently, WHU published the first WHU RT-GIM and UPC upgraded the real-time VTEC interpolation technique. A new version of IRTG has been developed and broadcasted since January 04 of 2021. The IGS combined RT-GIM is based on the weighted mean value of VTEC from different IGS centers as Eq. 7.

$$\begin{cases} VTEC_{IRTG,t} = \sum_{g=1}^{N_{AC}} (w_{g,t} \cdot VTEC_{g,t}) \\ w_{g,t} = I_{g,t} / \sum_{g=1}^{N_{AC}} (I_{g,t}) \\ I_{g,t} = 1 / RMS_{\delta,g,t}^2 \\ RMS_{\delta,g,t} = \sqrt{\sum_{i=1}^{N_t} (\delta_{g,i})^2 / N_t} \end{cases} \quad (7)$$

where  $VTEC_{IRTG,t}$  is the VTEC of IGS combined RT-GIM and  $VTEC_{g,t}$  is VTEC of RT-GIM  $g$  from IGS center  $i$  at epoch  $t$ .  $N_{AC}$  is the number of IGS centers.  $w_{g,t}$  is the weight of corresponding RT-GIM  $g$  at epoch  $t$  (the sum of  $w_{g,t}$  at epoch  $t$  is 1).  $RMS_{\delta,g,t}$  is the root mean square of RT-dSTEC error at epoch  $t$ .  $I_{g,t}$  is the inverse of the squared RMS-mean square of RT-dSTEC error  $RMS_{\delta,i}^2$  and  $\delta_i$  at epoch  $t$ .  $N_t$  is the number of RT-dSTEC observations from the beginning epoch to current epoch  $t$ .  $\delta_{g,i}$  is the RT-dSTEC error of IGS-center  $i$  RT-GIM  $g$  in the RT-dSTEC assessment.

In addition, the RT-dSTEC assessment is based on Root Mean Square (RMS) of the dSTEC error calculated by Eq. 8. In order to adapt to the real-time processing mode, the reference STEC ambiguous measurement  $L_{GF}(t_{E_{ref}}) - L_{GF,t_{ref}}$  is set to be the first elevation angle higher than  $10^\circ$  within continuous phase-arc to enable the dSTEC-RT-dSTEC calculation in the elevation-ascending arc.

$$\delta_{g,t} = \frac{1}{\alpha_{GF}} ((L_{GF,t} - L_{GF,t_{ref}}) - (M_z \cdot VTEC_{g,t} - M_{z_{ref}} \cdot VTEC_{g,t_{ref}})) \quad (8)$$

where  $\delta_{g,t}$  is the dSTEC error of GIM  $g$  at epoch  $t$ .  $t_{ref}$  is the epoch when reference elevation angle is stored.  $L_{GF}(t)$  is the difference between carrier phase observations at first and second frequency at epoch  $t$ .  $M(t)$  is  $M_z$  and  $M_{z_{ref}}$  are the mapping function at of zenith angle of epoch  $t$ , and  $V(t)_{GIM}$  is the VTEC from GIM at epoch  $t$  and zenith angle of reference epoch  $t_{ref}$ , respectively.

Due to the limited number of RT-stations real-time stations, 25 common RT-stations real-time stations that have been used by all the IGS real-time ionosphere centers are selected for allowing a fair RT-dSTEC assessment. The distribution can be seen as Fig. 1. Therefore, the RT-dSTEC is the measurement of "internal" post-fit residuals of RT-GIMs, and still sensitive to the accuracy of assessed GIMs. Every 20 minutes, the RT-dSTEC assessment is performed and used for the combination of different IGS RT-GIMs. The steps for the generation of IRTG can be seen as Fig. 2. The RTCM-SSR has been the standard message for real-time corrections, and the IGS State Space Representation (SSR) Format Version 1.00 was published on October 05 of 2020 (IGS, 2020). The content of ISG-SSR is compatible with RTCM-SSR contents, while ISG-SSR supports more extensions. And the IGS-SSR format can support more extensions such as satellite attitude, phase center offsets and variations in the near future. At present, both RTCM-SSR and IGS-SSR formats are used for the dissemination of RT-GIMs. In addition, IGS defines different reference for antenna correction: Average Phase Center (APC), and Center of Mass (CoM). The current status

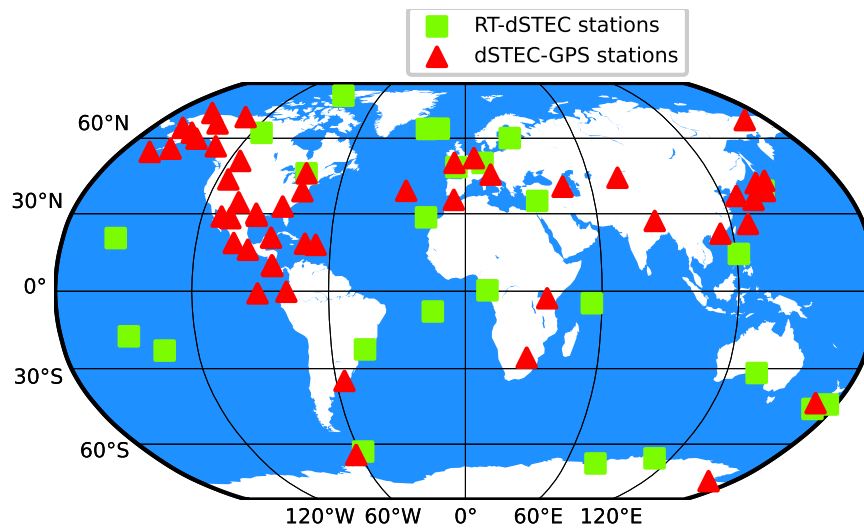

**Figure 1.** The 25 common ~~RT-stations~~real-time stations for RT-dSTEC assessment (in green color) and 50 external GNSS stations for dSTEC-GPS assessment (in red color)

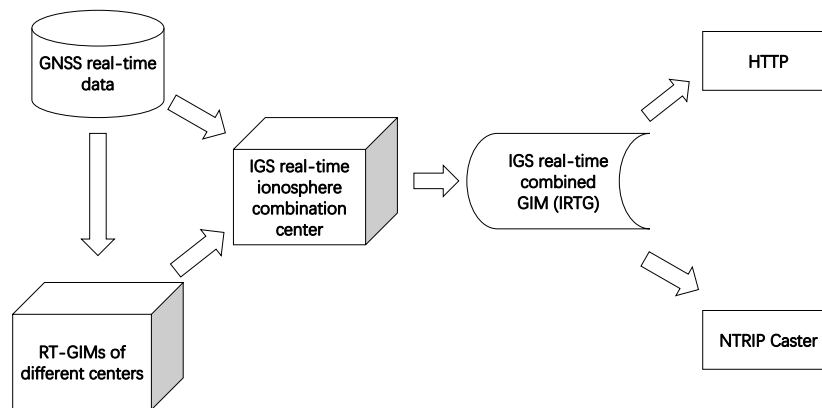

**Figure 2.** Data flow for the IGS real-time combined GIM

of RT-GIMs from different ionosphere centers can be seen as Table 2. It should be noted that "SSRA" means the SSR with APC reference, and "SSRC" means the SSR with CoM reference.

**Table 2.** The current status of broadcasting IGS RT-GIMs

| Agency             | Temporal resolution | Broadcast frequency | Spherical harmonic degree | Mountpoints in NTRIP caster                                                                                                                                                                                                                                                                                              | Real-Time IONEX saved at FTP/HTTP                                                         |
|--------------------|---------------------|---------------------|---------------------------|--------------------------------------------------------------------------------------------------------------------------------------------------------------------------------------------------------------------------------------------------------------------------------------------------------------------------|-------------------------------------------------------------------------------------------|
| CAS                | 5 minutes           | 1 minute            | 15                        | 123.56.176.228:2101/CAS05 <sup>a</sup><br>59.110.42.14:2101/SSRA00CAS1 <sup>b</sup><br>59.110.42.14:2101/SSRA00CAS0 <sup>a</sup><br>59.110.42.14:2101/SSRC00CAS1 <sup>b</sup><br>59.110.42.14:2101/SSRC00CAS0 <sup>a</sup><br>182.92.166.182:2101/IONO00CAS1 <sup>b</sup><br>182.92.166.182:2101/IONO00CAS0 <sup>a</sup> | ftp://ftp.gipp.org.cn/product/ionex/<br>(update at the end of day)                        |
| CNES               | 2 minutes           | 1 minute            | 12                        | products.igs-ip.net:2101/CLK91 <sup>a</sup><br>products.igs-ip.net:2101/SSRA00CNE1 <sup>b</sup><br>products.igs-ip.net:2101/SSRA00CNE0 <sup>a</sup><br>products.igs-ip.net:2101/SSRC00CNE1 <sup>b</sup><br>products.igs-ip.net:2101/SSRC00CNE0 <sup>a</sup>                                                              | No                                                                                        |
| UPC<br>(only UADG) | 15 minutes          | 15 seconds          | 15                        | products.igs-ip.net:2101/IONO00UPC1 <sup>b</sup>                                                                                                                                                                                                                                                                         | http://chapman.upc.es/tomion/real-time/quick/<br>(UADG and USRG, update every 15 minutes) |
| WHU                | 5 minutes           | 1 minute            | 15                        | 58.49.58.150:2106/IONO00WHU0 <sup>a</sup>                                                                                                                                                                                                                                                                                | No                                                                                        |
| IGS                | 20 minutes          | 15 seconds          | 15                        | products.igs-ip.net:2101/IONO00IGS1 <sup>b</sup>                                                                                                                                                                                                                                                                         | http://chapman.upc.es/irtg/<br>(update every 20 minutes)                                  |

<sup>a</sup> RTCM-SSR format

<sup>b</sup> IGS-SSR format

3 The performance of IGS RT-GIMs

255 In this section, the performance of IGS RT-GIMs was analyzed, and compared with IGS rapid GIMs as well as IGS combined final GIM(IGSG). It should be noted that the RT-GIMs were gathered with BKG Ntrip Client (BNC) software (Weber et al., 2016) and generated by received spherical harmonic coefficients from different centers as Table 2. And there were two kinds of temporal resolution for received RT-GIMs: the common temporal resolution of 20 minutes, and the full (original) temporal

260 resolution. Since the IRTG is combined every 20 minutes, we will focus on such a common time resolution to compare the performance. The detail of compared RT-GIMs can be seen as Table 3. The influence of temporal resolution on RT-GIMs was also shown in this section.

Before detailing the JASON3-VTEC and GPS-dSTEC assessment, it should be taken into account that the GIM error versus JASON-VTEC measurements have a high correlation with the GIM error versus dSTEC-GPS based measurements, although the JASON-VTEC measurements are vertical and the dSTEC-GPS measurements are slant. As demonstrated in Hernández-Pajares et al. (2017), the Jason3-VTEC assessment and dSTEC-GPS assessment are independent and consistent for GIM evaluation. In other words, the slant ray path geometry changes does not affect the capability of dSTEC reference data to rank the GIM, and the electron content between the Jason3-altimeter and the GNSS satellites does not significantly affect the assessment of GIMs based on Jason3-VTEC data.

**Table 3.** The Id. of compared IGS RT-GIMs

| Agency | 20-minute RT-GIM | RT-GIM with full temporal resolution |
|--------|------------------|--------------------------------------|
| CAS    | crtg             | crfg                                 |
| CNES   | cnes             | cnfs                                 |
| UPC    | upc1             | upf1                                 |
| WHU    | whu0             | whf0                                 |
| IGS    | irtg             | irfg <sup>a</sup>                    |

<sup>a</sup> irfg and irtg are the same.

### 3.1 Jason3-VTEC assessment

270 The VTEC from the Jason3-altimeter was gathered as an external reference over ~~oceans which were also the most challenging regions for GIMs (typically containing few nearby receivers in such regions)~~the oceans. After applying a sliding window of 16 seconds to smooth the altimeter measurements, the typical standard deviation of Jason3-VTEC measurement error is around 1 TECU. Although the electron content above Jason3-altimeter (about 1300 km) is not available and the altimeter bias is around a few TECU, the standard deviation of the difference between GIM-VTEC and Jason3-VTEC is adopted to  
275 avoid the Jason3-altimeter bias and the constant bias component of the plasmaspheric electron content in the assessment. The plasmaspheric electron content variation is up to a few TECU and is relatively a small part when compared with the GIM errors over the oceans. And Jason3-VTEC has been proven to be a reliable reference of VTEC on ~~a global scale (Hernández-Pajares et al., 2017)~~the oceans where are the most challenging regions for GIMs (containing few nearby receivers in such regions) and typically far from permanent GNSS receivers potentially contributing to the GIM (Roma-Dollase et al., 2018b; Hernán  
280 . In this context, the daily standard deviation of the difference between Jason3-VTEC and ~~GIM was selected~~GIM-VTEC was

suitable as the statistic for GIM assessment in Eq. 9.

$$\begin{cases} Bias_g = \sum_{i=1}^{N_J} (VTEC_{Jason3,i} - VTEC_{g,i}) / N_J \\ STD_g = \sqrt{\sum_{i=1}^{N_J} (VTEC_{Jason3,i} - VTEC_{g,i} - Bias_g)^2 / (N_J - 1)} \end{cases} \quad (9)$$

where  $VTEC_{Jason,i}$  and  $VTEC_{GIM,i}$  are VTEC extracted from Jason3 and GIM observation  $i$ , respectively.  $N$  is the number of involved observations.

285 The recent ~~one-month-of data (January 03 to February 02 in three-month data (December 01 of 2020 to March 01 of 2021),~~ containing the two significant events (new contributing ~~GIM from WHU~~ RT-GIM (WHU) from January 03 of 2021 and the introduction of the new tomographic-atomic decomposition UPC-GIM (UADG) on ~~Jan~~ January 04, 2021) has been selected to study the consistency and performance of the IGS RT-GIMs.

As can be seen in Fig. 3, the standard deviation of UPC RT-GIM (upc1) VTEC versus measured Jason3-VTEC is worse than  
 290 other RT-GIMs before the transition from USRG to UADG on January 04, 2021. It should be noted that the upc1 in RTCM-SSR format was stopped from December 15 of 2020 to January 2 of 2021, due to the change of broadcasting format and some technical issues. The assessment of upc1 was based on the UPC RT-GIMs saved in local repository during the interrupted period. The standard deviation of upc1 VTEC versus measured Jason3-VTEC reached around 7 TECU on December 6 of 2020 due to the interruption of downloading module. And the upc1 achieved a significant improvement after the transition ~~from~~  
 295 ~~USRG to UADG on January 04, on January 04, 2021.~~ In addition, the accuracy of IGS experimental combined RT-GIM (irtg) also increased due to the better performance of upc1. Compared with IGS rapid GIMs (corg, ehrg, emrg, esrg, igrg, jprg, uhrg, uprg, uqrg, whrg) and IGS final combined GIM (igsg), the upc1 and irtg are equivalent to the post-processed GIMs and even better than some rapid GIMs. The accuracy of CAS RT-GIM (crtg) and CNES RT-GIM (cnes) are close to the post-processed GIMs, while WHU RT-GIM (whu0) is slightly worse than the other GIMs. As shown and explained in Eq. 4, the whu0 is  
 300 shifted by 0 hours. To see the influence of phase-shifted  $\lambda_{S,t}$ , the whu0 is manually shifted by 2 hours (i.e., take  $t_0$  as 2 hours for whu0 in Eq. 4) in post-processing mode. And the accuracy of the 2-hour shifted WHU RT-GIM (whu1) is slightly better than whu0 as can be seen in Fig. 3.

In order to investigate the influence of temporal resolution on RT-GIMs over oceans, different RT-GIMs with full temporal resolution were involved. The summary of Jason3-VTEC assessment can be seen in Table 4. The overall standard deviation of  
 305 GIM-VTEC minus Jason3-VTEC is computed in separate time periods to focus on the influence of the transition from USRG to UADG. As shown in Table 4, the overall standard deviation of GIM-VTEC versus Jason3-VTEC is consistent with the Fig. 3 and the quality of 20-minute and full temporal resolution of RT-GIMs are similar over oceans. And the accuracy of 2-hour shifted whu1 in Jason3-VTEC assessment is higher than whu0 in Table 4. In particular, the overall standard deviation of upc1  
VTEC versus measured Jason3-VTEC drops from 4.3 to 2.7 TECU and, in agreement with that, the standard deviation of irtg  
 310 VTEC versus measured Jason3-VTEC decreases from 3.3 to 2.8 TECU.

**Table 4.** Standard deviation of GIM-VTEC minus Jason3-VTEC ~~from January 03 to February 02 of 2021~~ in Jason3-VTEC assessment (last ~~column~~two columns), and dSTEC-GPS assessment results of RT-GIMs on January 03 (second and third column) and January 05 (fourth and fifth column) in 2021.

| GIM         | RMS error of<br>January 03 in<br><u>dSTEC-GPS</u><br><u>assessment</u><br>(TECU) | Relative error<br>of January 03<br><u>in dSTEC-GPS</u><br><u>assessment</u><br>(%) | RMS error of<br>January 05 in<br><u>dSTEC-GPS</u><br><u>assessment</u><br>(TECU) | Relative error<br>of January 05<br><u>in dSTEC-GPS</u><br><u>assessment</u><br>(%) | Overall stan-<br>dard deviation of<br>the GIM-VTEC<br>versus measured<br>Jason3-VTEC<br>from December<br>01 of 2020 to<br>January 03 of 2021<br>in Jason3-VTEC<br>assessment<br>(TECU) | Overall standard<br>deviation of<br>GIM-VTEC<br>versus measured<br>Jason3-VTEC<br>from January 04 of<br>2021 to March 01<br>of 2021 in Jason3-<br>VTEC assessment<br>(TECU) |
|-------------|----------------------------------------------------------------------------------|------------------------------------------------------------------------------------|----------------------------------------------------------------------------------|------------------------------------------------------------------------------------|----------------------------------------------------------------------------------------------------------------------------------------------------------------------------------------|-----------------------------------------------------------------------------------------------------------------------------------------------------------------------------|
| corg        | 6.63                                                                             | 103.22                                                                             | 6.08                                                                             | 89.28                                                                              | <del>2.8</del> <u>3.1</u>                                                                                                                                                              | <u>2.9</u>                                                                                                                                                                  |
| ehrg        | 2.54                                                                             | 39.55                                                                              | 2.81                                                                             | 41.23                                                                              | <u>3.0</u>                                                                                                                                                                             | 2.8                                                                                                                                                                         |
| emrg        | 2.62                                                                             | 40.75                                                                              | 2.73                                                                             | 40.08                                                                              | <del>3.0</del> <u>3.2</u>                                                                                                                                                              | <u>2.9</u>                                                                                                                                                                  |
| esrg        | 2.70                                                                             | 41.98                                                                              | 3.06                                                                             | 44.99                                                                              | <del>2.9</del> <u>3.2</u>                                                                                                                                                              | <u>3.0</u>                                                                                                                                                                  |
| igrgr       | 2.60                                                                             | 40.40                                                                              | 3.06                                                                             | 44.99                                                                              | <del>2.7</del> <u>2.9</u>                                                                                                                                                              | <u>2.8</u>                                                                                                                                                                  |
| jprgr       | 2.73                                                                             | 42.46                                                                              | 2.86                                                                             | 41.98                                                                              | <del>2.6</del> <u>2.8</u>                                                                                                                                                              | <u>2.7</u>                                                                                                                                                                  |
| uhrg        | 1.91                                                                             | 29.69                                                                              | 2.21                                                                             | 32.43                                                                              | <del>2.9</del> <u>3.9</u>                                                                                                                                                              | <u>2.8</u>                                                                                                                                                                  |
| uprg        | 2.04                                                                             | 31.80                                                                              | 2.41                                                                             | 35.39                                                                              | <u>3.9</u>                                                                                                                                                                             | 2.8                                                                                                                                                                         |
| uqrg        | 1.89                                                                             | 29.44                                                                              | 2.19                                                                             | 32.24                                                                              | <del>2.9</del> <u>3.5</u>                                                                                                                                                              | <u>2.8</u>                                                                                                                                                                  |
| whrg        | 2.42                                                                             | 37.63                                                                              | 2.65                                                                             | 38.94                                                                              | <del>2.7</del> <u>3.0</u>                                                                                                                                                              | <u>2.8</u>                                                                                                                                                                  |
| igsg        | 2.33                                                                             | 36.25                                                                              | 2.57                                                                             | 37.74                                                                              | <del>2.4</del> <u>2.6</u>                                                                                                                                                              | <u>2.5</u>                                                                                                                                                                  |
| crtg        | 3.36                                                                             | 52.25                                                                              | 3.86                                                                             | 56.67                                                                              | <u>3.6</u>                                                                                                                                                                             | 3.2                                                                                                                                                                         |
| crfg        | 4.29                                                                             | 66.67                                                                              | 3.92                                                                             | 57.56                                                                              | <u>3.7</u>                                                                                                                                                                             | 3.2                                                                                                                                                                         |
| cnes        | <b>3.35</b>                                                                      | 52.13                                                                              | 3.74                                                                             | 54.86                                                                              | <del>3.3</del> <u>3.5</u>                                                                                                                                                              | <u>3.4</u>                                                                                                                                                                  |
| cnfs        | 3.58                                                                             | 55.73                                                                              | 4.62                                                                             | 67.88                                                                              | <del>3.3</del> <u>3.5</u>                                                                                                                                                              | <u>3.4</u>                                                                                                                                                                  |
| upc1        | 3.85                                                                             | 59.91                                                                              | <b>2.80</b>                                                                      | 41.06                                                                              | <u>4.3</u>                                                                                                                                                                             | <b>2.7</b>                                                                                                                                                                  |
| upf1        | 3.87                                                                             | 60.20                                                                              | 2.81                                                                             | 41.26                                                                              | <u>4.5</u>                                                                                                                                                                             | <b>2.7</b>                                                                                                                                                                  |
| whu0        | 5.19                                                                             | 80.69                                                                              | 5.45                                                                             | 79.84                                                                              | <del>4.5</del> <u>4.3</u>                                                                                                                                                              | <u>4.4</u>                                                                                                                                                                  |
| whf0        | 5.31                                                                             | 82.61                                                                              | 5.54                                                                             | 81.28                                                                              | <del>4.5</del> <u>4.3</u>                                                                                                                                                              | <u>4.4</u>                                                                                                                                                                  |
| <u>whu1</u> | <u>4.37</u>                                                                      | <u>67.97</u>                                                                       | <u>4.40</u>                                                                      | <u>64.55</u>                                                                       | <u>4.3</u>                                                                                                                                                                             | <u>3.8</u>                                                                                                                                                                  |
| irtg        | <u>4.11</u>                                                                      | 63.86                                                                              | <u>3.37</u>                                                                      | 49.47                                                                              | <del>2.7</del> <u>3.3</u>                                                                                                                                                              | <u>2.8</u>                                                                                                                                                                  |

value in bold font means the corresponding RT-GIM has the best performance among the remaining RT-GIMs in each column, and values of irtg are underlined for comparison.



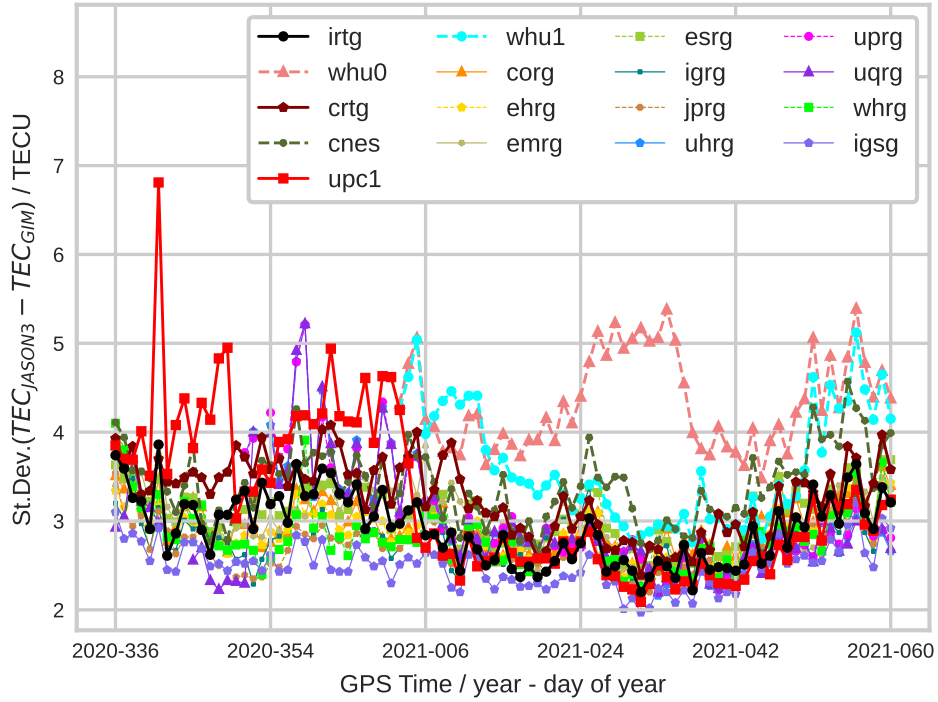

**Figure 3.** Daily standard deviation of GIM VTEC versus measured Jason3-VTEC (in TECU), from ~~January 03~~ December 01 of 2020 to ~~February 02 in~~ March 01 of 2021.

### 3.2 dSTEC-GPS assessment

In addition, dSTEC-GPS assessment in post-processing mode was involved as a complementary tool with high accuracy (better than 0.1 TECU) over continental regions on a global scale. In the dSTEC-GPS assessment, the maximum elevation angle within a continuous arc was regarded as the reference angle in Eq. 8. The dSTEC observations provide the direct measurements of the  
 315 difference of STEC within a continuous phase-arc involving different geometries. And the mapping function is used by GNSS  
users to convert GIM-VTEC to GIM-STEC for GNSS positioning. Therefore, the dSTEC observations, containing different  
geometries and mapping function error, are accurate and direct measurements for evaluating ray path GIM-STEC which is  
commonly used by GNSS users to calculate ionospheric correction. In addition, the common agreed ionospheric thin layer  
 320 analysis centers. And in this way the GNSS users are able to consistently recover a most accurate STEC from GIM-VTEC by  
the commonly agreed mapping function. The dSTEC-GPS assessment was performed by globally distributed GNSS stations as shown in Fig. 1 on January 03 (before the transition of UPC RT-GIM from USRG to UADG) and January 05 (after the transition) in 2021, with a focus on the transition of UPC RT-GIM. The RMS error and relative error were used for the

assessment as Eq. 10.

$$\begin{cases}
 RMS_{\delta,g} = \sqrt{\sum_{i=1}^{N_S} (\delta_{g,i})^2 / N_S} \\
 O_{\Delta_{S_{GPS}}} = (L_{GF,t} - L_{GF,t_{ref}}) / \alpha_{GF} \\
 RMS_{\Delta_{S_{GPS}}} = \sqrt{\sum_{i=1}^{N_S} (O_{\Delta_{S_{GPS}}})^2 / N_S} \\
 Relative\ error_g = 100 \cdot RMS_{\delta,g} / RMS_{\Delta_{S_{GPS}}}
 \end{cases} \quad (10)$$

where  $\delta_{g,i}$  is the dSTEC error of GIM  $g$  similar to Eq. 8 at epoch  $i$ , while the reference angle of Eq. 8 is replaced by the maximum elevation angle within a continuous arc.  $N_S$  is the number of involved observations.  $O_{\Delta_{S_{GPS}}}$  is the dSTEC-GPS observation.  $RMS_{\Delta_{S_{GPS}}}$  is the RMS of the observed dSTEC-GPS.  $Relative\ error_g$  is the relative error of GIM  $g$ .

As shown in Table 4, the RMS error of most post-processed GIMs reaches around 2 or 3 TECU, while the RMS error ranges from 2.8 to 5.54 TECU for RT-GIMs. The transition of UPC RT-GIM (upf1) from USRG to UADG is apparent in the dSTEC-GPS assessment, and the RMS error of IGS RT-GIM (irtg) decreased from 4.11 to 3.37 TECU due to the improvement of UPC RT-GIM. After the transition of upf1 UPC RT-GIM, the performance of upf1 and irtg is comparable with most post-processed GIMs. Similar to the performance in Jason3-VTEC assessment, the accuracy of remaining RT-GIMs is close to post-processed GIMs. And the RMS error of 2-hour shifted whu1 is around 4.4 TECU which is better than the whu0. Therefore, the 2-hour shift is recommended for  $\lambda_{S,t}$  in Eq. 4. It should be pointed out that the performance of RT-GIMs with the full temporal resolution is slightly worse than 20-minute RT-GIMs. Furthermore, the full temporal resolution RT-GIM is even worse than the GIM obtained by linear interpolation of the 20-minute RT-GIM in a sun-fixed reference frame. This is coincident with a smaller number of ionospheric observations at shorter time scales. In Fig. 4, the performance of IGS RT-GIMs after the upgrade of UPC interpolation method in dSTEC-GPS assessment is represented. The higher values of RMS errors occur around the equator and southern hemisphere for all the RT-GIMs. And the higher values might be caused by the high electron density gradients at the equator and the sparse distribution of RT-stations real-time stations in the southern hemisphere.

### 3.3 The sensibility of RT-weighting real-time weighting technique

RT-dSTEC assessment of RT-GIMs was automatically running in real-time mode, and used for RT-weighting real-time weighting in the combination of IGS RT-GIMs. In order to compare with the dSTEC-GPS assessment, the RT-dSTEC assessment with RT-stations real-time stations in Fig. 1 was also performed on January 03 and January 05 in 2021. As can be seen in Table 5, the rank of RT-GIMs in RT-dSTEC assessment is similar to dSTEC-GPS assessment, but the RMS error values are larger. And the larger RMS error is coinciding with the much lower elevation angle of the observation reference in RT-dSTEC assessment.

The real-time weights of RT-GIMs can be defined as the normalized inverse of the squared RMS of RT-dSTEC errors and represent the accuracy of RT-GIMs in the RT-dSTEC assessment. For each RT-GIM, the number of daily winning epochs is computed by counting the number of epochs within the day when the one RT-GIM is better than the other RT-GIMs. The evolution of real-time weights daily winning epochs of RT-GIMs shown in the bottom figure of Fig. 5 is consistent with the

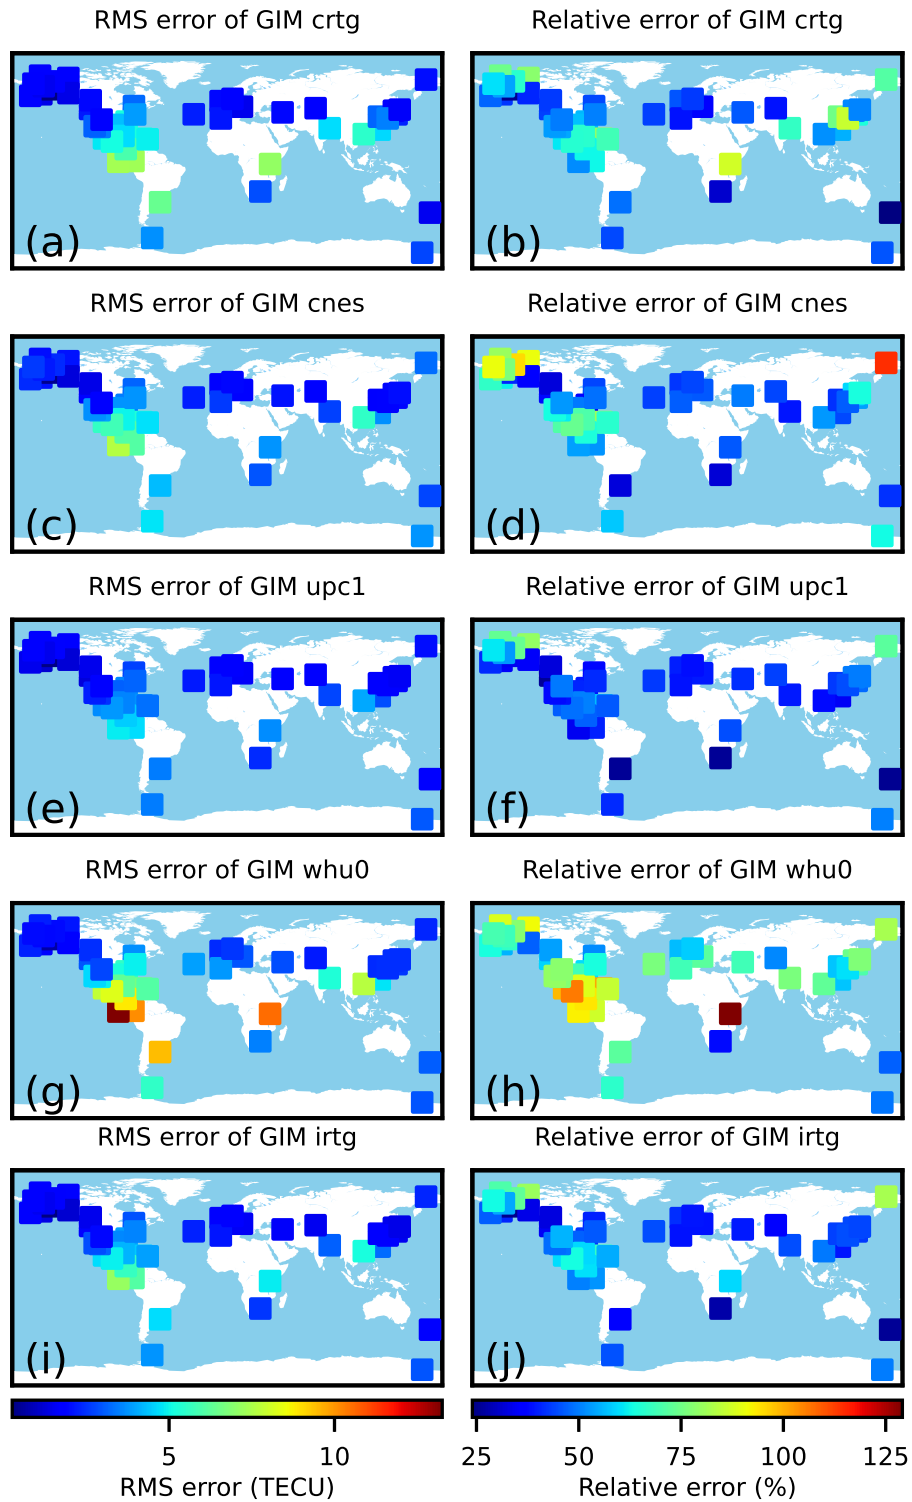

**Figure 4.** The distribution of dSTEC-GPS results on January 05 of 2021 (after the ~~transition~~-improvement of UPC interpolation technique).

**Table 5.** RMS errors of RT-GIMs in RT-dSTEC assessment on January 03 and January 05 in 2021.

| GIM  | RMS error of January 03 (TECU) | RMS error of January 05 (TECU) |
|------|--------------------------------|--------------------------------|
| upc1 | 4.24                           | <b>3.91</b>                    |
| crtg | 4.25                           | 4.98                           |
| cnes | <b>3.98</b>                    | 4.07                           |
| whu0 | 5.94                           | 5.81                           |

value in bold font means the corresponding RT-GIM has the best performance among the remaining RT-GIMs in each column.

Jason3-VTEC assessment. The upc1 was not involved in the combination from December 15 of 2020 to January 2 of 2021  
355 when the dissemination of upc1 was stopped, as can be seen in the bottom figure of Fig. 5. The significant improvement of the  
transition of upc1 from USRG to UADG shown in dSTEC-GPS and Jason3-VTEC assessment is also obvious in the top figure  
of Fig. 5. In addition, the ~~weight evolution and~~ daily winning epochs evolution and the transition in Fig. 5 are consistent with  
the accuracy of RT-GIMs providing a combined RT-GIM which is one of the best RT-GIMs, as shown in the altimeter-based  
and dSTEC-based assessments. The good performance of the combination algorithm can be mainly explained from the point  
360 of view of the weights, i.e. the sensitivity of the dSTEC error to the quality of the RT-GIMs. But also from the point of view of  
the linear combination that can play a positive role under any potential negative correlation between the performance of pairs  
of involved RT-GIMs.

### 3.4 The response of ~~GEC~~ RT-GIMs to recent minor geomagnetic storms~~in RT-GIMs~~

The ~~GEC~~ Global Electron Content (GEC) is defined as the total number of free electrons in the ionosphere. Hence the GEC can  
365 be estimated from the summation of the product of the VTEC value and the area of the corresponding GIM cell. In addition,  
GEC has been used as ionospheric index (Afraimovich et al., 2006; Hernández-Pajares et al., 2009). With the purpose of  
further checking the consistency of IGS RT-GIMs, the GEC of RT-GIMs was calculated and compared from January 24 to  
January 29 in 2021. It should be noted that the solar activity is low in January of 2021. During the selected period, several  
weak geomagnetic storms and one moderate geomagnetic storm occurred according to the classification of geomagnetic indices  
370 (Loewe and Prölss, 1997; Gonzalez et al., 1999), and the GEC evolution can be seen in Fig. 6. The GEC of CNES RT-GIM  
(cnfs) is slightly different from other RT-GIMs, and seems to be caused by the bias in CNES RT-GIM. There are some jumps  
in the GEC evolution of CAS RT-GIM (crfg) and WHU RT-GIM (whf0), and the jumps might be related to the handling of day  
boundary or unreal predicted GIM in certain cases. Compared with IGS final combined GIM (igsg), the good performance of  
global VTEC representation with upf1 and irfg can be seen in Fig. 6. In addition, the response of upf1 and irfg to the recent  
375 minor geomagnetic storms (detected by 3-hour ap and 1-hour Dst indices) is apparent and also similar to the post-processed  
IGS final combined GIM (igsg).

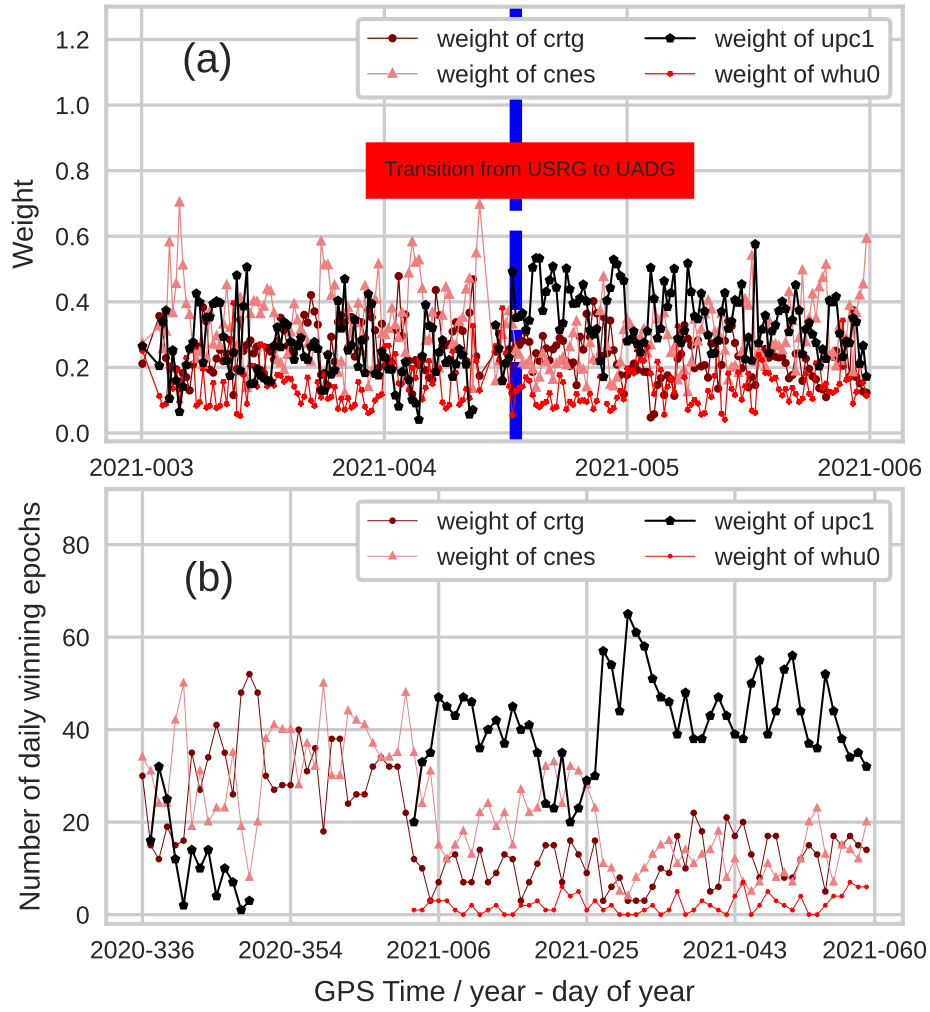

**Figure 5.** The evolution of real-time weights and daily winning epochs of RT-GIMs. (a) The real-time weights from January 03 to February 02 in of 2021 to January 05 of 2021. (b) The daily number of epochs when one of the top-figure RT-GIMs is a zoom-better than the others from December 01 of bottom-figure 2020 to March 01 of 2021.

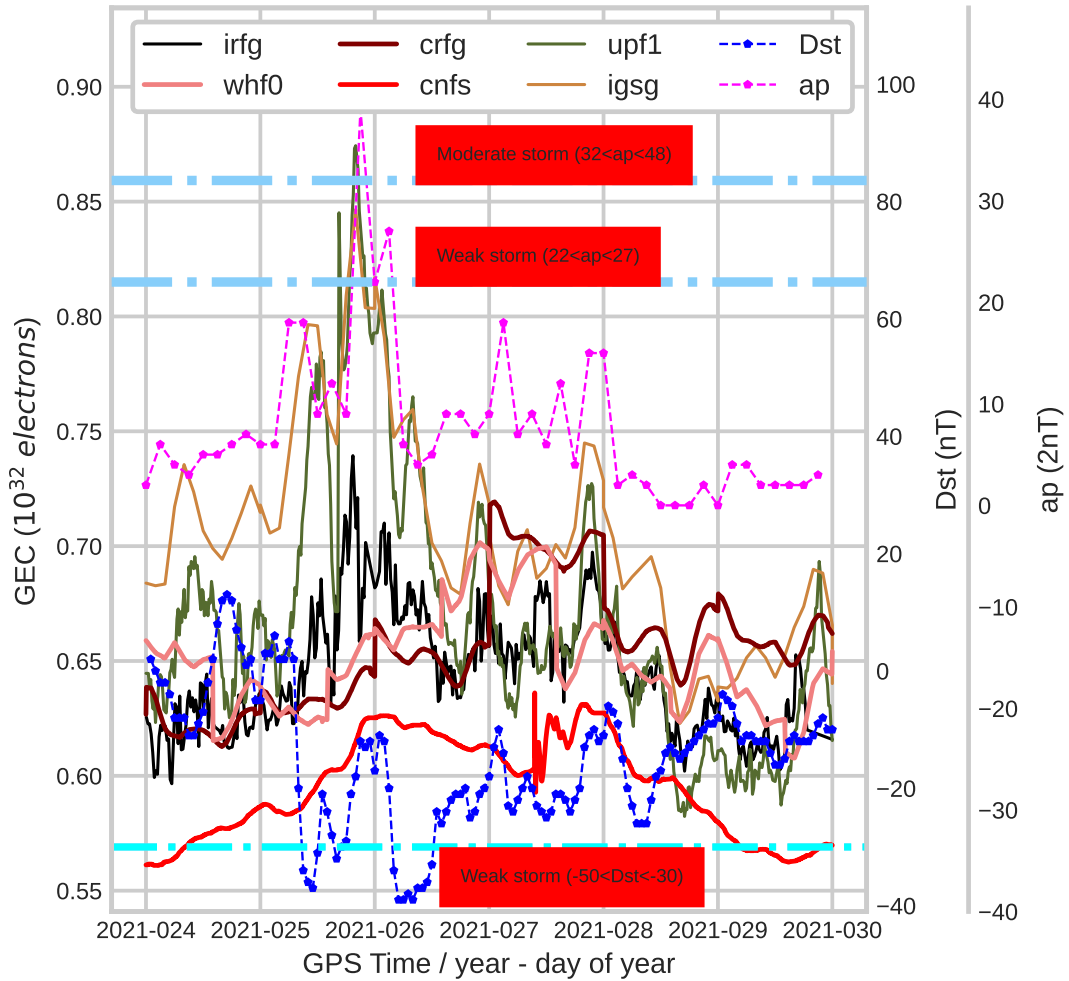

**Figure 6.** The GEC, ap and Dst evolution of RT-GIMs from January 24 to January 29 of 2021 during the low solar activity period.

#### 4 Data availability

The IGS real-time combined GIMs during the testing period are available from Zenodo at <http://doi.org/10.5281/zenodo.5042622> (Liu et al., 2021b) in IONEX format (Schaer et al., 1998). In addition, more archived IGS combined RT-GIMs  
380 can be found at <http://chapman.upc.es/irtg/archive/> and the latest IGS combined RT-GIMs are available in real-time mode at [http://chapman.upc.es/irtg/last\\_results/](http://chapman.upc.es/irtg/last_results/).

## 5 Conclusions

In this paper, we have summarized the computation methods of RT-GIMs from four individual IGS ionosphere centers and introduced the new version of IGS combined RT-GIM. According to the results of Jason3-VTEC and dSTEC-GPS assessment, it could be concluded as follows:

- The ~~RT-weighting~~ real-time weighting technique for the generation of IGS combined RT-GIM ~~turns out to be effective~~ is performing well when it is compared with Jason3-VTEC and dSTEC-GPS assessment.
- The transition of UPC RT-GIM from USRG to UADG is obvious in all involved assessments and also demonstrates the sensibility of the ~~RT-weighting~~ real-time weighting technique to RT-GIMs when the accuracy of RT-GIMs is increased.
- The quality of most IGS RT-GIMs is close to post-processed GIMs.
- The difference among RT-GIMs with 20-minute and full temporal resolution can be neglected over oceans in Jason3-VTEC assessment (see Fig. 3 and Table 4), while the difference is visible in some RT-GIMs over continental regions in dSTEC-GPS assessment (see Table 4). The lower accuracy of GIMs with full temporal resolution (2 or 5 minutes) might be related to the uneven distribution of ionospheric observations, the weight between predicted GIMs and real-time observations. Combined with the previous study (Liu et al., 2021a), it is suggested to find a more suitable temporal resolution for the generation of RT-GIM in sun-fixed reference frame.

In addition, the GEC evolution of UPC RT-GIM and IGS combined RT-GIM is close to the GEC evolution of IGS final combined GIM in post-processing mode, and has an obvious response to the geomagnetic storm during the low solar activity period. Future improvements might include:

- To broadcast real-time RMS maps that can be useful for the positioning users.
- To increase the accuracy of high temporal resolution RT-GIMs. In addition, higher maximum spherical harmonic degrees might be adopted to increase the accuracy and spatial resolution of RT-GIMs.
- Coinciding with a much larger number of RT-GNSS receivers in the future, the dSTEC weighting might be improved by replacing the "internal" by the "external" receivers, i.e. not used by any ~~RT~~ real-time analysis centers. In this way the weighting would be sensitive as well to the interpolation/extrapolation error of the different ~~RT~~ real-time ionospheric GIMs to be combined. And the resulting combination might behave better.
- To increase the number of worldwide GNSS receivers used for the RT-dSTEC up to more than 100. In this way we will be able to study the potential upgrade of the present global weighting to a regional ~~one~~ new weighting among other potential improvements in the combination strategy.

*Author contributions.* QL wrote the manuscript. QL developed the updated combination software with contributions from DRD, HY and MHP. QL and MHP designed the research, with contributions from HY, EMM, DRD and AGR. QL, HY, EMM, MHP, ZL, NW, DL, AB,



Q. Zhao and Q. Zhang provided the real-time GIMs of the corresponding IGS centers. AH, MS, GW and AS contributed in creating the framework of the real-time IGS service, the ionospheric message format and BNC open software updates. LA suggested the initial idea of this work. AK, SS, JF, AK, RGF and AGR contributed in the generation of rapid and final IGS GIMs used as additional reference in the manuscript.

*Competing interests.* The authors declare that they have not conflict of interest.

*Acknowledgements.* The first author is grateful for the financial support of the China Scholarship Council (CSC). The contribution from UPC-IonSAT authors was partially supported by the European Union funded project 101007599 - PITHIA-NRF and by the ESSP/ICAO funded project TEC4SpaW. The work of AK is supported by the National Centre for Research and Development, Poland, through grant ARTEMIS (decision numbers DWM/PL-CHN/97/2019 and WPC1/ARTEMIS/2019). The authors are thankful to the collaborative and friendly framework of the International GNSS Service, an organization providing first-class open data and open products (Johnston et al., 2017). The VTEC data from Jason3-altimeter were gathered from the NASA EOSDIS Physical Oceanography Distributed Active Archive Center (PO.DAAC) at the Jet Propulsion Laboratory, Pasadena, CA (<http://dx.doi.org/10.5067/GHGMR-4FJ01>) and the National Oceanic and Atmospheric Administration (NOAA). We are also thankful to the ap and Dst indexes from GeoForschungsZentrum (GFZ) and World Data Center (WDC) for Geomagnetism, Kyoto.

## References

- Afraimovich, E., Astafyeva, E., Oinats, A., Yasukevich, Y. V., and Zhivetiev, I.: Global electron content and solar activity: comparison with IRI modeling results, in: poster presentation at IGS Workshop, Darmstadt, Germany, 2006.
- Caissy, M., Agrotis, L., Weber, G., Hernandez-Pajares, M., and Hugentobler, U.: Innovation: Coming Soon-The International GNSS Real-Time Service, <https://www.gpsworld.com/gnss-systemaugmentation-assistanceinnovation-coming-soon-13044/>, last access: March 21 2021, 2012.
- Chen, J., Ren, X., Zhang, X., Zhang, J., and Huang, L.: Assessment and Validation of Three Ionospheric Models (IRI-2016, NeQuick2, and IGS-GIM) From 2002 to 2018, *Space Weather*, 18, e2019SW002422, <https://doi.org/10.1029/2019SW002422>, 2020.
- Ciraolo, L., Azpilicueta, F., Brunini, C., Meza, A., and Radicella, S.: Calibration errors on experimental slant total electron content (TEC) determined with GPS, *Journal of Geodesy*, 81, 111–120, <https://doi.org/10.1007/s00190-006-0093-1>, 2007.
- Elsobeiey, M. and Al-Harbi, S.: Performance of real-time Precise Point Positioning using IGS real-time service, *GPS solutions*, 20, 565–571, <https://doi.org/10.1007/s10291-015-0467-z>, 2016.
- Feltens, J.: Development of a new three-dimensional mathematical ionosphere model at European Space Agency/European Space Operations Centre, *Space Weather*, 5, S12002, <https://doi.org/10.1029/2006SW000294>, 2007.
- Feltens, J. and Schaer, S.: IGS Products for the Ionosphere, in: *Proceedings of the 1998 IGS Analysis Center Workshop Darmstadt, Germany*, pp. 3–5, 1998.
- Fernandes, M. J., Lázaro, C., Nunes, A. L., and Scharroo, R.: Atmospheric corrections for altimetry studies over inland water, *Remote Sensing*, 6, 4952–4997, <https://doi.org/10.3390/rs6064952>, 2014.
- Froń, A., Galkin, I., Krankowski, A., Bilitza, D., Hernández-Pajares, M., Reinisch, B., Li, Z., Kotulak, K., Zakharenkova, I., Cherniak, I., et al.: Towards Cooperative Global Mapping of the Ionosphere: Fusion Feasibility for IGS and IRI with Global Climate VTEC Maps, *Remote Sensing*, 12, 3531, <https://doi.org/10.3390/rs12213531>, 2020.
- García-Rigo, A., Monte, E., Hernández-Pajares, M., Juan, J., Sanz, J., Aragón-Angel, A., and Salazar, D.: Global prediction of the vertical total electron content of the ionosphere based on GPS data, *Radio science*, 46, RS0D25, <https://doi.org/10.1029/2010RS004643>, 2011.
- García Rigo, A., Roma Dollase, D., Hernández Pajares, M., Li, Z., Terkildsen, M., Ghoddousi Fard, R., Dettmering, D., Erdogan, E., Haralambous, H., Beniguel, Y., et al.: St. Patrick’s day 2015 geomagnetic storm analysis based on real time ionosphere monitoring, in: *EGU 2017: European Geosciences Union General Assembly: Vienna, Austria: 23-28 April 2017: proceedings book*, 2017.
- Ghoddousi-Fard, R.: GPS ionospheric mapping at Natural Resources Canada, in: *IGS workshop, Pasadena*, 2014.
- Gonzalez, W. D., Tsurutani, B. T., and De Gonzalez, A. L. C.: Interplanetary origin of geomagnetic storms, *Space Science Reviews*, 88, 529–562, <https://doi.org/10.1023/A:1005160129098>, 1999.
- Gulyaeva, T. and Stanislawski, I.: Derivation of a planetary ionospheric storm index, *Annales Geophysicae*, 26, 2645–2648, <https://doi.org/10.5194/angeo-26-2645-2008>, 2008.
- Gulyaeva, T. L., Arkan, F., Hernandez-Pajares, M., and Stanislawski, I.: GIM-TEC adaptive ionospheric weather assessment and forecast system, *Journal of Atmospheric and Solar-Terrestrial Physics*, 102, 329–340, <https://doi.org/10.1016/j.jastp.2013.06.011>, 2013.
- Hernández-Pajares, M., Juan, J., and Sanz, J.: Neural network modeling of the ionospheric electron content at global scale using GPS data, *Radio Science*, 32, 1081–1089, <https://doi.org/10.1029/97RS00431>, 1997.
- Hernández-Pajares, M., Juan, J., Sanz, J., and Solé, J.: Global observation of the ionospheric electronic response to solar events using ground and LEO GPS data, *Journal of Geophysical Research: Space Physics*, 103, 20789–20796, <https://doi.org/10.1029/98JA01272>, 1998.

- Hernández-Pajares, M., Juan, J., and Sanz, J.: New approaches in global ionospheric determination using ground GPS data, *Journal of Atmospheric and Solar-Terrestrial Physics*, 61, 1237–1247, [https://doi.org/10.1016/S1364-6826\(99\)00054-1](https://doi.org/10.1016/S1364-6826(99)00054-1), 1999.
- 465 Hernández-Pajares, M., Juan, J., Sanz, J., Orus, R., García-Rigo, A., Feltens, J., Komjathy, A., Schaer, S., and Krankowski, A.: The IGS VTEC maps: a reliable source of ionospheric information since 1998, *Journal of Geodesy*, 83, 263–275, <https://doi.org/10.1007/s00190-008-0266-1>, 2009.
- Hernández-Pajares, M., Roma-Dollase, D., Krankowski, A., García-Rigo, A., and Orús-Pérez, R.: Methodology and consistency of slant and vertical assessments for ionospheric electron content models, *Journal of Geodesy*, 91, 1405–1414, [https://doi.org/10.1007/s00190-017-](https://doi.org/10.1007/s00190-017-1032-z)
- 470 1032-z, 2017.
- Hernández-Pajares, M., Lyu, H., Aragón-Àngel, À., Monte-Moreno, E., Liu, J., An, J., and Jiang, H.: Polar Electron Content From GPS Data-Based Global Ionospheric Maps: Assessment, Case Studies, and Climatology, *Journal of Geophysical Research: Space Physics*, 125, e2019JA027 677, <https://doi.org/10.1029/2019JA027677>, 2020.
- Hoque, M. M., Jakowski, N., and Orús-Pérez, R.: Fast ionospheric correction using Galileo Az coefficients and the NTCM model, *GPS Solutions*, 23, 41, <https://doi.org/10.1007/s10291-019-0833-3>, 2019.
- 475 IGS: IGS State Space Representation (SSR) Format Version 1.00, [https://files.igs.org/pub/data/format/igs\\_ssr\\_v1.pdf](https://files.igs.org/pub/data/format/igs_ssr_v1.pdf), last access: March 21 2021, 2020.
- Jakowski, N., Hoque, M., and Mayer, C.: A new global TEC model for estimating transionospheric radio wave propagation errors, *Journal of Geodesy*, 85, 965–974, <https://doi.org/10.1007/s00190-011-0455-1>, 2011.
- 480 Jiang, H., Liu, J., Wang, Z., An, J., Ou, J., Liu, S., and Wang, N.: Assessment of spatial and temporal TEC variations derived from ionospheric models over the polar regions, *Journal of Geodesy*, 93, 455–471, <https://doi.org/10.1007/s00190-018-1175-6>, 2019.
- Johnston, G., Riddell, A., and Hausler, G.: The International GNSS Service, in: *Springer Handbook of Global Navigation Satellite Systems* (1st ed., edited by Teunissen, P. J. and Montenbruck, O., pp. 967–982, Springer International Publishing, Cham, Switzerland, <https://doi.org/10.1007/978-3-319-42928-1>, 2017.
- 485 Komjathy, A. and Born, G. H.: GPS-based ionospheric corrections for single frequency radar altimetry, *Journal of Atmospheric and Solar-Terrestrial Physics*, 61, 1197–1203, [https://doi.org/10.1016/S1364-6826\(99\)00051-6](https://doi.org/10.1016/S1364-6826(99)00051-6), 1999.
- Komjathy, A., Galvan, D., Stephens, P., Butala, M., Akopian, V., Wilson, B., Verkhoglyadova, O., Mannucci, A., and Hickey, M.: Detecting ionospheric TEC perturbations caused by natural hazards using a global network of GPS receivers: The Tohoku case study, *Earth, planets and space*, 64, 1287–1294, <https://doi.org/10.5047/eps.2012.08.003>, 2012.
- 490 Laurichesse, D. and Blot, A.: New CNES real time products including BeiDou., <https://lists.igs.org/pipermail/igsmail/2015/001017.html>, last access: March 21 2021, 2015.
- Le, A. Q. and Tiberius, C.: Single-frequency precise point positioning with optimal filtering, *GPS solutions*, 11, 61–69, <https://doi.org/10.1007/s10291-006-0033-9>, 2007.
- Li, M., Yuan, Y., Wang, N., Li, Z., and Huo, X.: Performance of various predicted GNSS global ionospheric maps relative to GPS and JASON TEC data, *GPS Solutions*, 22, 55, <https://doi.org/10.1007/s10291-018-0721-2>, 2018.
- 495 Li, X., Ge, M., Zhang, H., and Wickert, J.: A method for improving uncalibrated phase delay estimation and ambiguity-fixing in real-time precise point positioning, *Journal of Geodesy*, 87, 405–416, <https://doi.org/10.1007/s00190-013-0611-x>, 2013.
- Li, Z., Yuan, Y., Wang, N., Hernandez-Pajares, M., and Huo, X.: SHPTS: towards a new method for generating precise global ionospheric TEC map based on spherical harmonic and generalized trigonometric series functions, *Journal of Geodesy*, 89, 331–345, <https://doi.org/10.1007/s00190-014-0778-9>, 2015.
- 500

- Li, Z., Wang, N., Hernández Pajares, M., Yuan, Y., Krankowski, A., Liu, A., Zha, J., García Rigo, A., Roma-Dollase, D., Yang, H., et al.: IGS real-time service for global ionospheric total electron content modeling, *Journal of Geodesy*, 94, 32, <https://doi.org/10.1007/s00190-020-01360-0>, 2020.
- 505 Liu, J.-Y., Chen, Y., Chuo, Y., and Chen, C.-S.: A statistical investigation of preearthquake ionospheric anomaly, *Journal of Geophysical Research: Space Physics*, 111, A05 304, <https://doi.org/10.1029/2005JA011333>, 2006.
- Liu, L., Wan, W., Ning, B., and Zhang, M.-L.: Climatology of the mean total electron content derived from GPS global ionospheric maps, *Journal of Geophysical Research: Space Physics*, 114, A06 308, <https://doi.org/10.1029/2009JA014244>, 2009.
- Liu, Q., Hernández-Pajares, M., Lyu, H., and Goss, A.: Influence of temporal resolution on the performance of global ionospheric maps, *Journal of Geodesy*, 95, 34, <https://doi.org/10.1007/s00190-021-01483-y>, 2021a.
- 510 Liu, Q., Hernández-Pajares, M., Yang, H., Monte-Moreno, E., Roma, D., García Rigo, A., Li, Z., Wang, N., Laurichesse, D., Blot, A., Zhao, Q., and Zhang, Q.: Global Ionosphere Maps of vertical electron content combined in real-time from the RT-GIMs of CAS, CNES, UPC-IonSAT, and WHU International GNSS Service (IGS) centers (from Dec 1, 2020, to March 1, 2021), <https://doi.org/10.5281/zenodo.5042622>, 2021b.
- Loewe, C. and Prölss, G.: Classification and mean behavior of magnetic storms, *Journal of Geophysical Research: Space Physics*, 102, 14 209–14 213, <https://doi.org/10.1029/96JA04020>, 1997.
- 515 Lou, Y., Zheng, F., Gu, S., Wang, C., Guo, H., and Feng, Y.: Multi-GNSS precise point positioning with raw single-frequency and dual-frequency measurement models, *Gps Solutions*, 20, 849–862, <https://doi.org/10.1007/s10291-015-0495-8>, 2016.
- Mannucci, A., Wilson, B., Yuan, D., Ho, C., Lindqwister, U., and Runge, T.: A global mapping technique for GPS-derived ionospheric total electron content measurements, *Radio science*, 33, 565–582, <https://doi.org/10.1029/97RS02707>, 1998.
- 520 Orús, R., Hernández-Pajares, M., Juan, J., and Sanz, J.: Improvement of global ionospheric VTEC maps by using kriging interpolation technique, *Journal of Atmospheric and Solar-Terrestrial Physics*, 67, 1598–1609, <https://doi.org/10.1016/j.jastp.2005.07.017>, 2005.
- Ren, X., Chen, J., Li, X., Zhang, X., and Freeshah, M.: Performance evaluation of real-time global ionospheric maps provided by different IGS analysis centers, *GPS Solutions*, 23, 113, <https://doi.org/10.1007/s10291-019-0904-5>, 2019.
- Roma Dollase, D., López Cama, J. M., Hernández Pajares, M., García Rigo, A., et al.: Real-time Global Ionospheric modelling from GNSS data with RT-TOMION model, in: 5th International Colloquium Scientific and Fundamental Aspects of the Galileo Programme, pp. 27–29, 2015.
- 525 Roma-Dollase, D., Hernández-Pajares, M., García Rigo, A., Krankowski, A., Fron, A., Laurichesse, D., Blot, A., Orús-Pérez, R., Yuan, Y., Li, Z., Wang, N., Schmidt, M., and Erdogan, E.: Looking for optimal ways to combine global ionospheric maps in real-time, in: IGS workshop 2018, Oct 29-Nov2, Wuhan, 2018a.
- 530 Roma-Dollase, D., Hernández-Pajares, M., Krankowski, A., Kotulak, K., Ghoddousi-Fard, R., Yuan, Y., Li, Z., Zhang, H., Shi, C., Wang, C., et al.: Consistency of seven different GNSS global ionospheric mapping techniques during one solar cycle, *Journal of Geodesy*, 92, 691–706, <https://doi.org/10.1007/s00190-017-1088-9>, 2018b.
- RTCM-SC: Proposal of new RTCM SSR messages, SSR Stage 2: Vertical TEC (VTEC) for RTCM Standard 10403.2 Differential GNSS (global navigation satellite system) Services—Version 3, RTCM Special Committee 104, 2014.
- 535 Schaer, S., Beutler, G., Rothacher, M., and Springer, T. A.: Daily global ionosphere maps based on GPS carrier phase data routinely produced by the CODE Analysis Center, in: Proceedings of the IGS AC Workshop, Silver Spring, MD, USA, March 19-21, 1996.
- Schaer, S., Gurtner, W., and Felten, J.: IONEX: The ionosphere map exchange format version 1, in: Proceedings of the IGS AC workshop, Darmstadt, Germany, vol. 9, 1998.

- Sezen, U., Arikan, F., Arikan, O., Ugurlu, O., and Sadeghimorad, A.: Online, automatic, near-real time estimation of GPS-TEC: IONOLAB-  
540 TEC, Space Weather, 11, 297–305, <https://doi.org/10.1002/swe.20054>, 2013.
- Sotomayor-Beltran, C., Sobey, C., Hessels, J., De Bruyn, G., Noutsos, A., Alexov, A., Anderson, J., Asgekar, A., Avruch, I., Beck, R.,  
et al.: Calibrating high-precision Faraday rotation measurements for LOFAR and the next generation of low-frequency radio telescopes,  
Astronomy & astrophysics, 552, A58, <https://doi.org/10.1051/0004-6361/201220728>, 2013.
- Tange, O.: Gnu parallel-the command-line power tool, The USENIX Magazine, 36, 42–47, <https://doi.org/10.5281/zenodo.16303>, 2011.
- 545 Tomaszewski, D., Wielgosz, P., Rapiński, J., Krypiak-Gregorczyk, A., Kaźmierczak, R., Hernández-Pajares, M., Yang, H., and OrúsPérez, R.:  
Assessment of Centre National d’Etudes Spatiales Real-Time Ionosphere Maps in Instantaneous Precise Real-Time Kinematic Positioning  
over Medium and Long Baselines, Sensors, 20, 2293, <https://doi.org/10.3390/s20082293>, 2020.
- Wang, N., Li, Z., Duan, B., Hugentobler, U., and Wang, L.: GPS and GLONASS observable-specific code bias estimation: comparison of  
solutions from the IGS and MGEX networks, Journal of Geodesy, 94, 74, <https://doi.org/https://doi.org/10.1007/s00190-020-01404-5>,  
550 2020.
- Weber, G., Mervart, L., Lukes, Z., Rocken, C., and Dousa, J.: Real-time clock and orbit corrections for improved point positioning via  
NTRIP, in: Proceedings of the 20th international technical meeting of the satellite division of the institute of navigation (ION GNSS  
2007), pp. 1992–1998, 2007.
- Weber, G., Mervart, L., Stürze, A., Rülke, A., and Stöcker, D.: BKG Ntrip Client, Version 2.12, vol. 49 of *Mitteilungen des Bundesamtes für*  
555 *Kartographie und Geodäsie*, Verlag des Bundesamtes für Kartographie und Geodäsie, Frankfurt am Main, 2016.
- Wright, J., Yang, A. Y., Ganesh, A., Sastry, S. S., and Ma, Y.: Robust face recognition via sparse representation, IEEE transactions on pattern  
analysis and machine intelligence, 31, 210–227, <https://doi.org/10.1109/TPAMI.2008.79>, 2008.
- Wright, J., Ma, Y., Mairal, J., Sapiro, G., Huang, T. S., and Yan, S.: Sparse representation for computer vision and pattern recognition,  
Proceedings of the IEEE, 98, 1031–1044, <https://doi.org/10.1109/JPROC.2010.2044470>, 2010.
- 560 Yang, H., Monte-Moreno, E., Hernández-Pajares, M., and Roma-Dollase, D.: Real-time interpolation of global ionospheric maps by means  
of sparse representation, Journal of Geodesy, 95, 71, <https://doi.org/10.1007/s00190-021-01525-5>, 2021.
- Zhang, B., Teunissen, P. J., Yuan, Y., Zhang, X., and Li, M.: A modified carrier-to-code leveling method for retrieving ionospheric  
observables and detecting short-term temporal variability of receiver differential code biases, Journal of Geodesy, 93, 19–28,  
<https://doi.org/10.1007/s00190-018-1135-1>, 2019.
- 565 Zhang, H., Gao, Z., Ge, M., Niu, X., Huang, L., Tu, R., and Li, X.: On the convergence of ionospheric constrained precise point positioning  
(IC-PPP) based on undifferential uncombined raw GNSS observations, Sensors, 13, 15 708–15 725, <https://doi.org/10.3390/s131115708>,  
2013a.
- Zhang, H., Xu, P., Han, W., Ge, M., and Shi, C.: Eliminating negative VTEC in global ionosphere maps using inequality-constrained least  
squares, Advances in Space Research, 51, 988–1000, <https://doi.org/10.1016/j.asr.2012.06.026>, 2013b.
- 570 Zhang, Q. and Zhao, Q.: Global ionosphere mapping and differential code bias estimation during low and high solar activity periods with  
GIMAS software, Remote Sensing, 10, 705, <https://doi.org/10.3390/rs10050705>, 2018.
- Zhang, Q. and Zhao, Q.: Analysis of the data processing strategies of spherical harmonic expansion model on global ionosphere mapping for  
moderate solar activity, Advances in Space Research, 63, 1214–1226, <https://doi.org/10.1016/j.asr.2018.10.031>, 2019.
- Zhao, B., Wan, W., Liu, L., Mao, T., Ren, Z., Wang, M., and Christensen, A.: Features of annual and semiannual variations derived from the  
575 global ionospheric maps of total electron content, Annales Geophysicae, 25, 2513–2527, <https://doi.org/https://doi.org/10.5194/angeo-25-2513-2007>, 2007.
